# 1 **The accuracy of polygenic score models for anthropometric traits and Type II** 2 **Diabetes in the Native Hawaiian Population**

3 Ying-Chu Lo<sup>1</sup>, Tsz Fung Chan<sup>1</sup>, Soyoun Jeon<sup>1</sup>, Gertraud Maskarinec<sup>2</sup>, Kekoa Taparra<sup>3</sup>, Nathan  
4 Nakatsuka<sup>4</sup>, Mingrui Yu<sup>5,6</sup>, Chia-Yen Chen<sup>5,6,7,8</sup>, Yen-Feng Lin<sup>6,9,10</sup>, Lynne R. Wilkens<sup>2</sup>, Loic Le  
5 Marchand<sup>2</sup>, Christopher A. Haiman<sup>1,11</sup>, and Charleston W.K. Chiang<sup>1,11,12</sup>

6  
7 <sup>1</sup>Center for Genetic Epidemiology, Department of Population and Public Health Sciences, Keck School of  
8 Medicine, University of Southern California, Los Angeles, CA, USA.

9 <sup>2</sup>Epidemiology Program, University of Hawai'i Cancer Center, University of Hawai'i, Manoa, Honolulu,  
10 HI, USA.

11 <sup>3</sup>Standard Health Care, Department of Radiation Oncology, Palo Alto, CA, USA.

12 <sup>4</sup>New York Genome Center, New York, NY, USA.

13 <sup>5</sup>Stanley Center for Psychiatric Research, Broad Institute of MIT and Harvard, Cambridge, MA, USA

14 <sup>6</sup>Center for Neuropsychiatric Research, National Health Research Institutes, Miaoli, Taiwan

15 <sup>7</sup>Biogen, Cambridge, MA, USA

16 <sup>8</sup>Psychiatric and Neurodevelopmental Genetics Unit, Massachusetts General Hospital, Boston, MA, USA

17 <sup>9</sup>Department of Public Health & Medical Humanities, School of Medicine, National Yang Ming Chiao  
18 Tung University, Taipei, Taiwan

19 <sup>10</sup>Institute of Behavioral Medicine, College of Medicine, National Cheng Kung University, Tainan, Taiwan

20 <sup>11</sup>Cancer Epidemiology Program, Norris Comprehensive Cancer Center, University of Southern California,  
21 Los Angeles, CA, USA.

22 <sup>12</sup>Department of Quantitative and Computational Biology, University of Southern California, Los Angeles,  
23 CA, USA.

## 24 **Abstract**

25  
26 Polygenic scores (PGS) are promising in stratifying individuals based on the genetic susceptibility  
27 to complex diseases or traits. However, the accuracy of PGS models, typically trained in European-  
28 or East Asian-ancestry populations, tend to perform poorly in other ethnic minority populations,  
29 and their accuracies have not been evaluated for Native Hawaiians. Using body mass index, height,  
30 and type-2 diabetes as examples of highly polygenic traits, we evaluated the prediction accuracies  
31 of PGS models in a large Native Hawaiian sample from the Multiethnic Cohort with up to 5,300  
32 individuals. We evaluated both publicly available PGS models or genome-wide PGS models  
33 trained in this study using the largest available GWAS. We found evidence of lowered prediction  
34 accuracies for the PGS models in some cases, particularly for height. We also found that using the  
35 Native Hawaiian samples as an optimization cohort during training did not consistently improve  
36 PGS performance. Moreover, even the best performing PGS models among Native Hawaiians  
37 would have lowered prediction accuracy among the subset of individuals most enriched with  
38 Polynesian ancestry. Our findings indicate that factors such as admixture histories, sample size  
39 and diversity in GWAS can influence PGS performance for complex traits among Native Hawaiian  
40 samples. This study provides an initial survey of PGS performance among Native Hawaiians and  
41 exposes the current gaps and challenges associated with improving polygenic prediction models  
42 for underrepresented minority populations.

43  
44 **Keywords:** Native Hawaiians, Polygenic Scores, GWAS summary statistics, BMI, height, type-2  
45 diabetes

## 47 **Introduction**

48 Genome-wide association studies (GWAS) have identified thousands of genetic variants  
49 associated with a plethora of human complex traits and diseases [1,2]. The success of GWAS has  
50 enabled a burgeoning field of post-GWAS analysis, including the computation of polygenic scores  
51 (PGS) for predicting the genetic risk for an individual based on their genotypes and available  
52 GWAS summary statistics to common diseases or complex traits [3,4]. On the basis of the GWAS  
53 summary statistics, the PGS is calculated as the sum of the trait-associated alleles an individual  
54 carries, weighted by the estimated effect sizes of the alleles. Recent developments have focused  
55 on extending PGS modeling to include variants and their appropriate weights genome-wide. Such  
56 genome-wide PGS tend to be more efficacious in predicting outcome than a simple approach of  
57 selecting only genome-wide significantly associated variants [5–7].

58 As the sample sizes of GWAS increased, the resulting PGS has become more effective in risk  
59 predictions, early disease detection, and the development of precision medicine [8,9]. However,  
60 available GWAS data are heavily biased towards European-ancestry individuals [10,11], posing a  
61 challenge for PGS due to its poor transferability between populations. In particular, PGS trained  
62 with European populations exhibit reduced prediction accuracy when applied to non-European  
63 populations [12,13]. This poor transferability has been demonstrated for several ethnic minority  
64 populations but has not been evaluated for Native Hawaiians, who make up the largest Pacific  
65 Islander population in the U.S. [14].

66 Native Hawaiians are known to have a higher risk of obesity, diabetes, and cardiovascular  
67 disease, among others both within Hawai‘i and nationally [15–19]. They also have the highest  
68 mortality rate in several types of cancer compared to other ethnic groups [20–22]. In addition, as  
69 consequence of centuries of colonization and globalization, Native Hawaiians are largely  
70 admixed[23–25], representing ancestry components derived from Polynesian ancestors (~40%)  
71 and recent (within the last 300 years or so) admixtures from European (~30%) and East Asian  
72 (~29%) immigrants, among others. These ancestries can also be correlated with elevated risks of  
73 certain metabolic diseases [15–17,19]. Despite these elevated disease risks, the Native Hawaiian  
74 population is largely understudied and underserved [23,25]. We generally lack the genomic  
75 resources and knowledge for this population to reap the benefits of genetic research and genomic  
76 medicine [23,26].

77 Predictions based on PGS is one area that is under-investigated for Native Hawaiians and can  
78 be potentially improved. To date, no systematic evaluation of PGS, particularly for metabolic traits  
79 and diseases such as body mass index (BMI) and type 2 diabetes (T2D), have been conducted for  
80 the Native Hawaiians. Given the underrepresentation of Polynesian ancestries in genomic studies  
81 and references, poor transferability of PGS models trained in the largest GWAS dataset is expected  
82 as is often observed with other populations and ethnic minorities. On the other hand, it is unclear  
83 whether the admixture alleviates some of the transferability issues of PGS at the population level.  
84 Because admixture levels vary across individuals within a population, even if admixture alleviates  
85 some of the transferability issues, it could create disparity within Native Hawaiian communities  
86 depending on individual’s genomic similarity to the underrepresented Polynesian ancestries. It is  
87 thus crucial to evaluate the transferability of PGS in this population and assess any disparities  
88 specific to Native Hawaiians in order to begin bridging this gap.

89 We conducted the present study using data from the Multiethnic Cohort (MEC) [27]. We  
90 leveraged the data of approximately 5,300 Native Hawaiian (MEC-NH), as well as populations as  
91 proxies for East Asian- and European ancestries (approximately 19,600 Japanese Americans,  
92 MEC-J; approximately 8,500 White Americans, MEC-W), who were genotyped on the Multi-

93 Ethnic Global Array (MEGA) or Global Diversity Array (GDA) arrays to evaluate the prediction  
94 accuracy of PGS for BMI, height, and T2D. We trained PGS models using summary statistics from  
95 the largest available consortium GWAS from European (EUR), East Asian (EAS), or multi-ethnic  
96 populations for BMI, height, and T2D. We focused on these traits as they are the most available  
97 and because they are closely linked to obesity, diabetes, and cardiovascular disease – diseases that  
98 show elevated risks within the Native Hawaiian population [18,28,29]. Furthermore, T2D was  
99 identified as one of the diseases that the Native Hawaiian communities expressed the most  
100 concerns [17,30]. Additionally, we assessed the efficacies of published PGS models from the PGS  
101 catalog [31] in MEC-NH. In each case, we also investigated the model efficacy in subsets of Native  
102 Hawaiians with higher estimated Polynesian ancestry.

103 We stress that we utilized this study design as a way to examine health disparities within the  
104 Native Hawaiian population, and as a way to evaluate how these models may transfer to other  
105 Polynesian-ancestry populations. We used empirical (and potentially noisy) estimates of genetic  
106 ancestries as a means to assess the impact on the accuracy of currently available PGS models due  
107 to admixture over the last 10-12 generations, which is a product of the colonization of the Hawaiian  
108 archipelago by Western countries. Interpretations of these estimates beyond the research context  
109 are socially complex, and thus should not supplant current practices based on genealogical records  
110 and self-reports. These estimates also do not imply any hierarchies or socially meaningful  
111 subdivisions in the Native Hawaiian communities.

112

## 113 **Results**

114

### 115 **Overview of the study design**

116 Focusing on complex traits and diseases (*i.e.* BMI, height, and T2D) for which large-scale  
117 GWAS summary statistics are publicly available, we took two different approaches to construct  
118 PGS models for evaluation (**Fig. 1**). We collected from literature the largest East Asian-ancestry  
119 (EAS), European-ancestry (EUR), and multi-ancestry (META) meta-analysis GWAS summary  
120 statistics for each trait (**Table S1**) to train PGS models. Based on the summary statistics for a  
121 particular trait, we used independent MEC subcohorts for as reference for linkage disequilibrium  
122 (LD) (N = 500) and for PGS optimization (N = 3000), and then validated the PGS model in an  
123 additional held-out sample (N = 1000) (**Methods**). We trained and optimized PGS models in either  
124 EUR-, EAS- or multi-ancestry cohorts, and tested the transferability of the best performing  
125 genomic PGS models in Native Hawaiians (Design I in **Fig. 1**).

126 Secondly, we explored the potential of using Native Hawaiians as the optimization cohort to  
127 improve the accuracies of PGS models within MEC-NH (Design II in **Fig. 1**). Because the Native  
128 Hawaiian population, or even the larger Polynesian-ancestry Pacific Islander populations, are  
129 generally much smaller in sample sizes compared to the available consortium GWAS from  
130 continental populations, it is generally infeasible to amass the sample sizes necessary for a well-  
131 powered GWAS that will be informative for PGS construction. We thus investigated whether the  
132 MEC-NH could be used for identifying the optimal PGS model to improve upon on the accuracy  
133 (hence alleviate the transferability issues) of PGS, even though the GWAS summary statistics were  
134 still derived from EAS, EUR, or multi-ancestry meta-analysis.

135

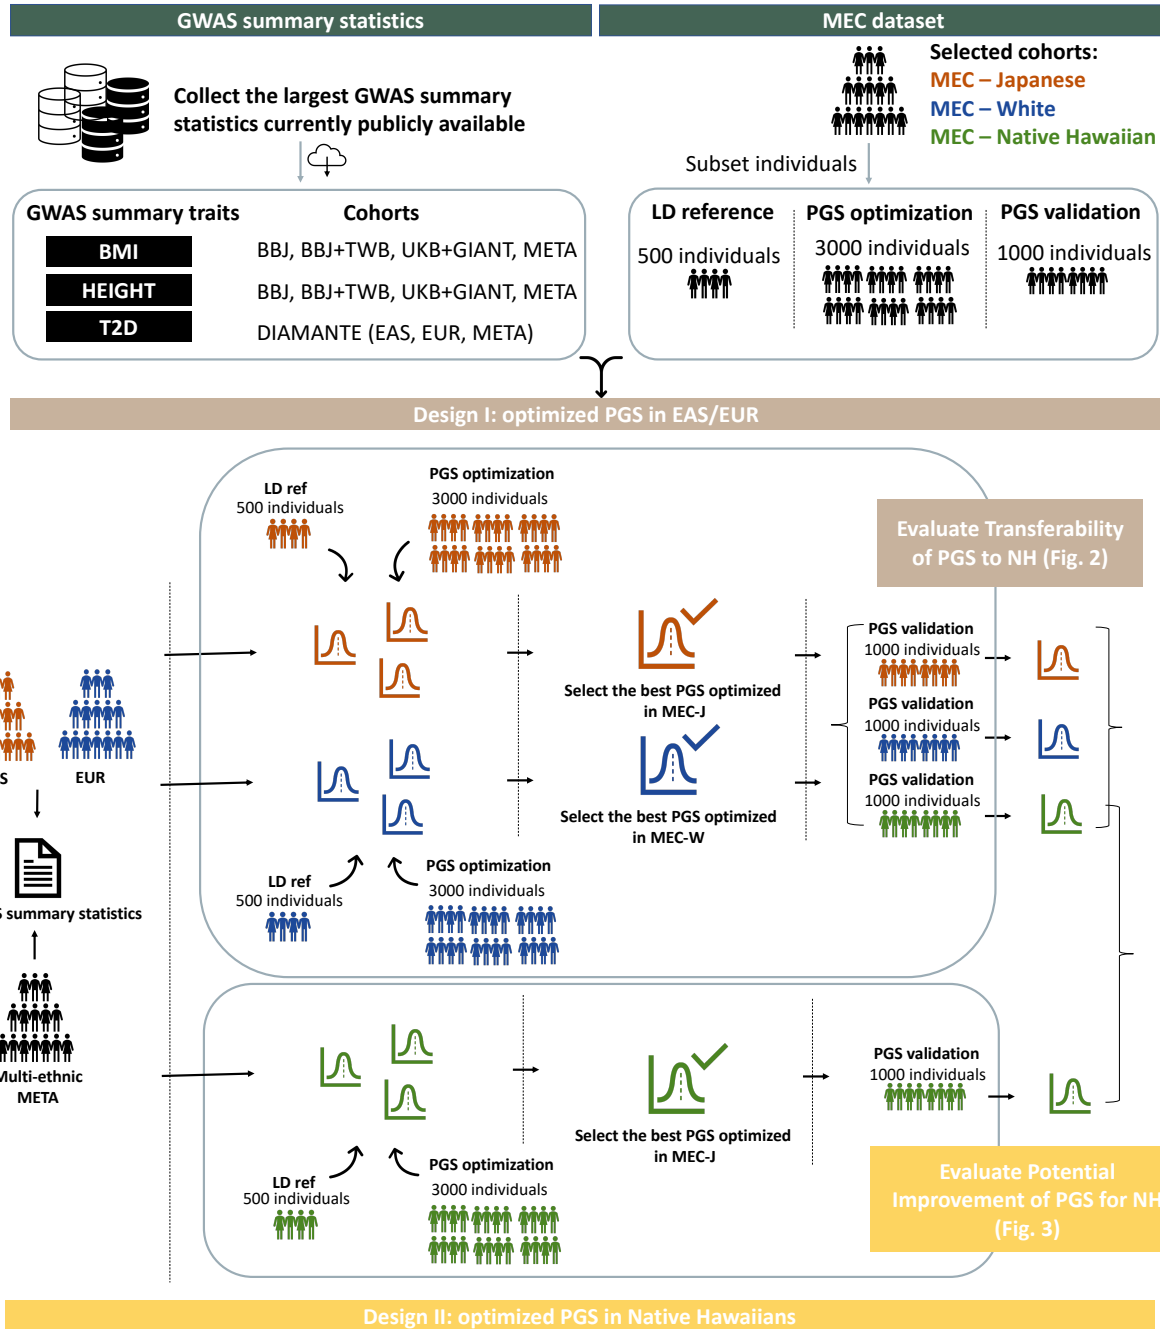

136  
137  
138  
139  
140  
141  
142  
143  
144  
145  
146  
147

**Fig 1. The overall study design of PGS evaluation in Native Hawaiians.** The GWAS summary statistics were downloaded from large consortiums and biobanks (BBJ, UKB+GIANT, BBJ+TWB, and META). Each population-specific GWAS (EAS, EUR) were used to train PGS models with the matching MEC cohort as the LD reference and optimization cohort (MEC-J for EAS, MEC-W for EUR). Multi-ancestry meta-analysis GWAS (META) were used to train PGS for both EAS and EUR populations. In Design I, EAS- or EUR-optimized PGS were validated in held-out MEC-J, MEC-W and MEC-NH samples. Comparisons of PGS prediction accuracy between MEC-NH and MEC-J or MEC-W provide the metric for transferability. In Design II, PGS models based on EAS or EUR GWAS were using MEC-NH, and the performance in held-out MEC-NH were then compared to the corresponding metric in Design I to assess potential improvement of prediction by PGS for MEC-NH. See **Table S1** for detailed descriptions of the GWAS datasets used for this study.

148 **Reduced prediction accuracy when applying EAS- or EUR-trained PGS to Native Hawaiians**  
149 **in some scenarios**

150 We first assessed the transferability of PGS to the Native Hawaiian population (Design I in  
151 **Fig. 1**). In this case, we identified GWAS summary statistics to build and optimize the PGS model  
152 using population-matched cohorts from the MEC, with the Japanese and Whites as representatives  
153 of the East Asian and European-ancestry cohorts, respectively (*i.e.* EAS GWAS were optimized  
154 using MEC-J; EUR GWAS were optimized using MEC-W; Multi-ancestry GWAS were optimized  
155 using either MEC-J or MEC-W separately). We then evaluated the performance of the PGS in  
156 held-out MEC-J, MEC-W, and MEC-NH individuals by  $R^2$ . Poor transferability is indicated if  
157 there is a noticeable drop-off in prediction accuracy when a PGS model optimized in one  
158 population (*e.g.* EAS GWAS optimized in MEC-J) is tested in another population (*e.g.* MEC-W  
159 or MEC-NH validation cohort).

160 As expected, PGS models optimized in MEC-J or MEC-W showed the highest prediction  
161 accuracy in validation cohorts from the same populations (**Fig. 2**). For instance, for BMI based on  
162 GWAS summary statistics from BBJ, the best PGS model optimized in MEC-J achieved the  
163 highest partial  $R^2$  in held-out MEC-J samples among the validation cohorts tested (partial  $R^2 =$   
164 0.059), while the best PGS model based on GWAS summary statistics from GIANT+UKB and  
165 optimized in MEC-W achieved the highest partial  $R^2$  in held-out MEC-W (partial  $R^2 = 0.088$ ).  
166 Moreover, consistent with the expectation of poor transferability, PGS trained in EAS tend to have  
167 reduced prediction accuracy in the other continental population. For instance, for BMI, EAS-  
168 trained PGS model for BMI had reduced partial  $R^2$  in MEC-W (0.059 vs. 0.022; one-sided  $p =$   
169 0.041 by bootstrapping), and EUR-trained PGS model for BMI performed more poorly in MEC-J  
170 (0.088 vs. 0.043; one-sided  $p = 0.045$ ). PGS models trained from multi-ancestry meta-analysis  
171 GWAS sometimes reduced the gap in prediction accuracy between MEC-J and MEC-W, though  
172 they do not necessarily have higher population-specific prediction accuracies depending on the  
173 traits examined (**Fig. 2**).

174 When validating EAS- or EUR-trained PGS in the Native Hawaiian cohort, transferability  
175 was not consistently poor, depending on the trait or the GWAS summary statistics used for training  
176 (**Fig.2**). For height, there were noticeable reduction in prediction accuracy (*e.g.* for EAS-trained  
177 PGS based on the BBJ GWAS, partial  $R^2 = 0.253$  in MEC-J to 0.048 for MEC-NH; one-sided  
178  $p < 0.001$ ). In contrast, EAS- or EUR-trained PGS for BMI showed little drop-off when evaluated  
179 in MEC-NH (**Fig.2**). T2D PGS models showed similar pattern as BMI, though the overall  
180 prediction accuracies are relatively low (**Fig.2**)



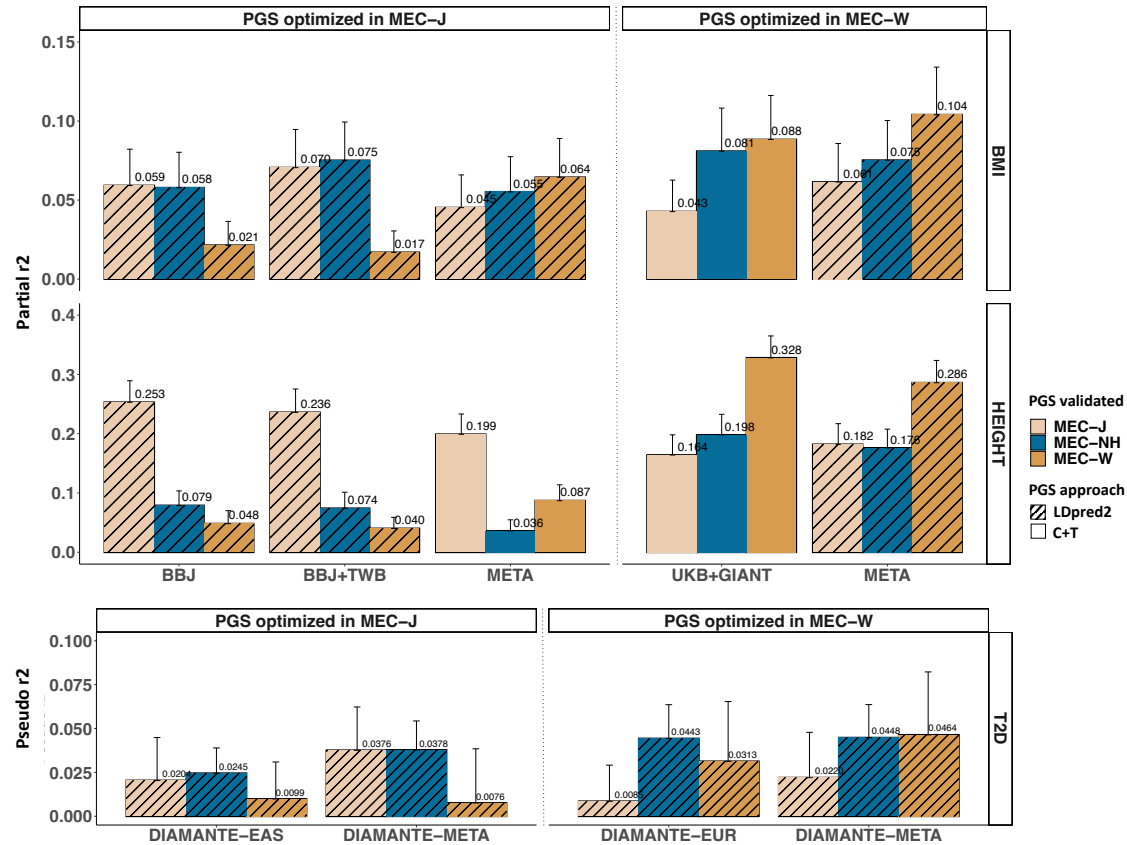

181  
182 **Fig 2. The transferability of EAS- and EUR-trained PGS for BMI, height and T2D.** The genomic PGS model  
183 with the highest prediction accuracy in optimization cohorts was validated in held-out MEC-J, MEC-W, and MEC-  
184 NH cohorts. This figure summarizes the results of analysis in Design I, Fig.1, and details of the model parameter for  
185 the best performing PGS model can be found in Table 1. Best model based on the C+T or LDpred2 approach are  
186 represented by blank or hashed bars, respectively. The standard error for the  $R^2$  were calculated using 1,000 sets of  
187 bootstrap samples. For BMI and height, random 1,000 individuals from each of MEC-J, MEC-W, and MEC-NH  
188 were used for validation. For T2D, all cases and controls that were not used in training were used for validation: 3,315  
189 cases and 6,700 controls for MEC-J, 496 cases and 4,063 controls for MEC-W, 392 cases and 549 controls for MEC-NH.

190  
191 **PGS optimized in Native Hawaiians did not necessarily improve the PGS transferability**

192 In absence of a large-scale powerful GWAS in Polynesian-ancestry populations, another  
193 possibility to improve the PGS prediction accuracies for Native Hawaiians may be to use the MEC-  
194 NH cohort for optimization, as this may lessen the differences in linkage disequilibrium between  
195 the training and validating cohorts and thereby reduce the transferability gap of PGS. Therefore,  
196 we employed MEC-NH as an additional optimized cohort, following the same pipeline (Design II,  
197 Fig.1) to compare with the PGS models optimized using MEC-J and MEC-W. When validated in  
198 held-out MEC-NH samples, we observed that generally speaking, PGS models optimized in MEC-  
199 NH did not necessarily have better prediction accuracy in the validation cohort (Fig.3). NH-  
200 optimized PGS models have at best similar prediction accuracies, if not worse (Fig. 3). Our results  
201 thus suggest that optimization in MEC-NH did not necessarily lead to improved PGS accuracy  
202 compared to using the optimization cohort with consistent ancestry as the cohort generated the  
203 GWAS summary statistics.

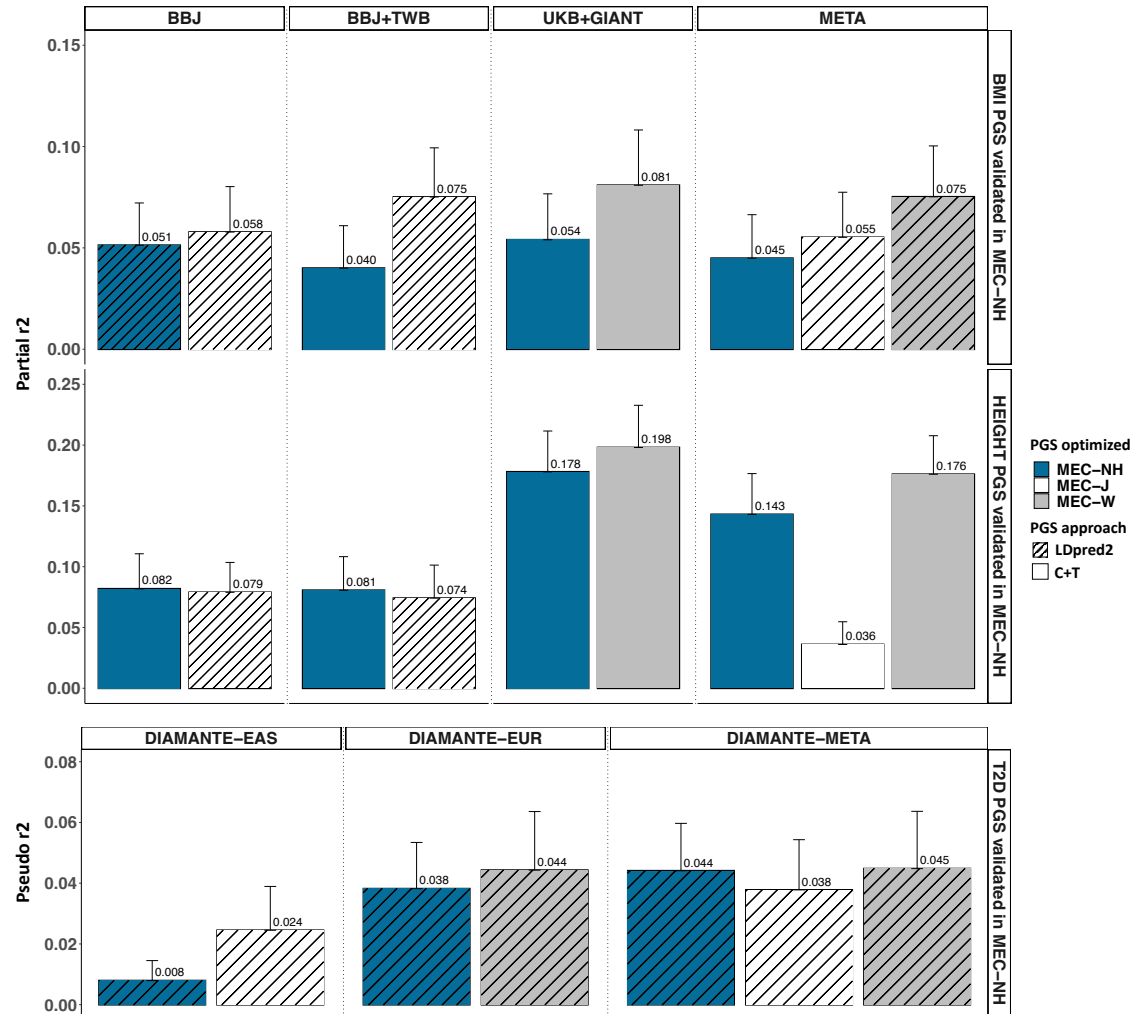

205  
 206 **Fig 3. The impact of MEC-NH as optimization cohort on PGS prediction accuracies in held-out MEC-NH for**  
 207 **BMI, height, and T2D.** For each combination of GWAS-trait PGS models that was previously optimized in MEC-J  
 208 or MEC-W in Fig.2, the same data was then optimized using MEC-NH samples here (Design II, Fig.1). Previously  
 209 optimized PGS models and the MEC-NH-optimized models were both validated in the held-out MEC-NH cohort to  
 210 evaluate if optimization in MEC-NH would improve the prediction accuracy in Native Hawaiians. Details of the model  
 211 parameter for the best performing PGS model can be found in Table S2. Best model based on the C+T or LDpred2  
 212 approach are represented by blank or hashed bars, respectively. The standard error for the  $R^2$  were calculated using  
 213 1,000 sets of bootstrap samples. For BMI and height, random 1,000 MEC-NH individuals were used for validation.  
 214 For T2D, 392 cases and 549 controls from MEC-NH were used for validation.

215  
 216 **Prediction accuracy of publicly available PGS models for Native Hawaiians**

217 We constructed the PGS evaluated here based on limited number of, albeit some of the largest  
 218 and most recent, GWAS meta-analysis datasets for BMI, height, and T2D (Table S1). However,  
 219 there are a number of published PGS models for these traits in the PGS catalog (Table S2, URL  
 220 <https://www.pgscatalog.org/>), some of which may have used different GWAS datasets or different  
 221 methodologies for constructing PGS. We thus validated all of the BMI (N = 11), height (N = 4),  
 222 and T2D (N = 10) PGS models available as of mid-2022 in MEC-NH, and compared them with  
 223 our top-performing PGS.

224 We found that the PGS developed in this study aligns closely with the best-performing public  
 225 PGS models for BMI and height in terms of prediction accuracy (**Fig. 4**). Moreover, in the case of  
 226 T2D, our PGS models developed based on the GWAS summary statistics from the DIAMANTE  
 227 European- or multi-ancestry meta-analysis [32] showed a higher level of predictive accuracy than  
 228 other PGS models found in the PGS catalog (**Fig.4**).  
 229  
 230  
 231

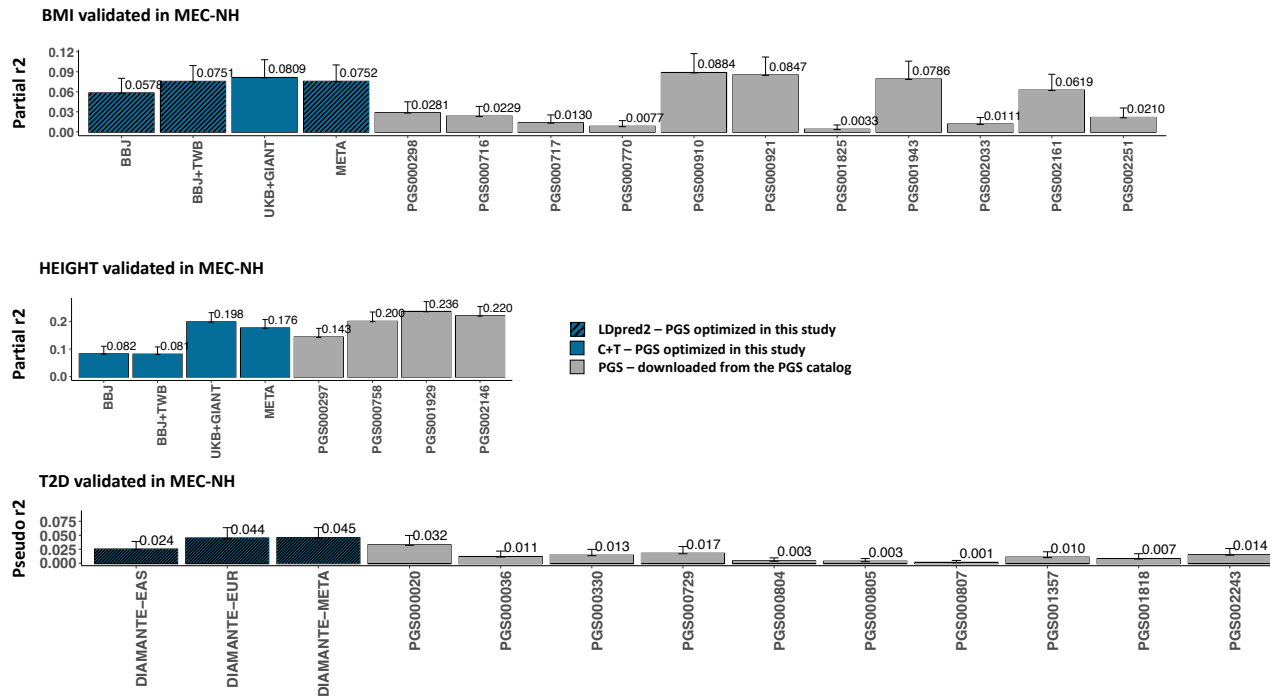

232  
 233 **Fig 4. A Comparison of PGS between the optimal PGS from this study and PGS from the PGS-catalog.** PGS  
 234 models available on the PGS catalog (URL <https://www.pgscatalog.org/>) as of May 18, 2022 were downloaded for  
 235 BMI, height, and T2D, and validated in the same MEC-NH individuals here. Blue bars represent the PGS constructed  
 236 in this study with the highest prediction accuracy in MEC-NH. Clear and hash bars indicate the PGS was derived from  
 237 C+T or LDpred2 approaches. Gray bars depict PGS from the PGS catalog. For BMI and height, random 1,000 MEC-  
 238 NH individuals were used for validation. For T2D, 392 cases and 549 controls from MEC-NH were used for validation.  
 239

## 240 **Reduced PGS prediction accuracy in the Native Hawaiians most enriched with Polynesian** 241 **ancestries**

242 The relatively comparable prediction accuracy of EAS- or EUR-trained PGS models or  
 243 publicly available PGS models in MEC-NH could be in part driven by admixture. However,  
 244 Polynesian ancestries exist on a continuum in the population. Because Polynesian ancestries are  
 245 likely the component of ancestries least similar to the ancestries of individuals participating in the  
 246 GWAS datasets, there may be disparity in PGS prediction accuracy among individuals with  
 247 different proportions of Polynesian ancestries [33]. Thus, we explored the accuracy of PGS in  
 248 subsets of 1000 Native Hawaiians with highest Polynesian ancestries (PNS; minimum estimated  
 249 proportion of ancestry = 65%), and compared to the 1000 randomly selection individuals. For  
 250 some PGS models, particularly the best publicly available PGS models for BMI, there was  
 251 substantially reduced prediction accuracy within the PNS subsets (**Fig.5**). For instance, the partial  
 252 R<sup>2</sup> for model PGS00910 was 0.088 in randomly selection MEC-NH, but 0.040 when applied in



253 PNS (one-sided  $P = 0.04$ ). In contrast, the PGS model in this study using the MEC-NH for  
 254 optimization showed relatively little reduction in performance (**Fig. 6**). These findings suggest that  
 255 while optimizing PGS in MEC-NH may not necessarily lead to improved transferability across  
 256 Native Hawaiians in general, it could yield enhanced PGS accuracy among Native Hawaiians  
 257 enriched with Polynesian ancestries, and thus may be more applicable to other Polynesian-ancestry  
 258 populations across the Pacific. However, because most of the MEC-NH data were used for  
 259 optimizing the PGS model, we have fewer individuals enriched with Polynesian ancestry to use as  
 260 validation, resulting in larger error bars and less stable estimates of the prediction accuracy of the  
 261 PGS models, and preventing us from evaluating PGS models for T2D as we ended with insufficient  
 262 number of cases and controls.

263  
 264

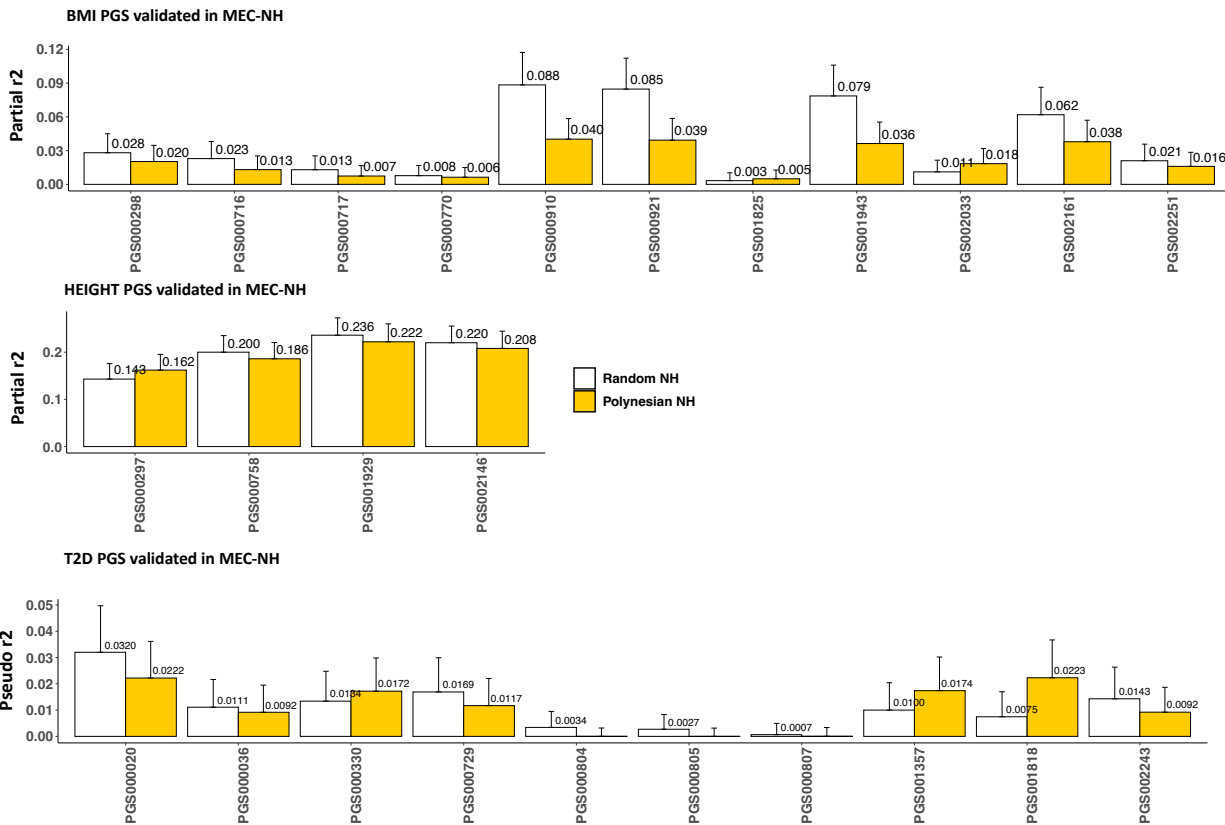

265  
 266 **Fig 5. Prediction accuracies of models from PGS catalog in the random Native Hawaiian and Native Hawaiian**  
 267 **with highest Polynesian ancestry validation sets.** Each PGS model from PGS catalog was assessed in validation  
 268 datasets from MEC-NH. For BMI and height, the validation cohort consisted of randomly selected 1000 MEC-NH or  
 269 the 1000 individuals with the highest estimated Polynesian ancestry (minimum estimated Polynesian ancestry = 65%)  
 270 among the entire MEC-NH cohort. This was not restricted to the 1,000 individuals reserved for validation in Figures  
 271 2-4 as none of the MEC-NH individuals were used in construction of the publicly available PGS models. For T2D,  
 272 because only 768 individuals (346 cases, 422 controls) with > 65% estimated Polynesian ancestry were available, we  
 273 compared to 768 randomly selected MEC-NH individuals (318 cases, 450 controls).

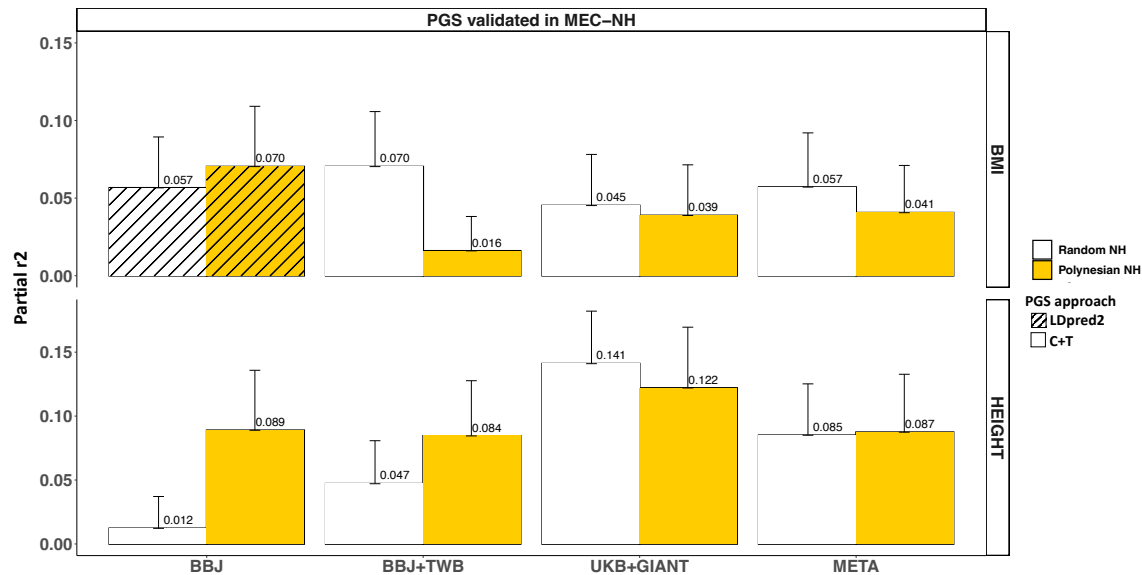

274  
275  
276  
277  
278  
279  
280  
281  
282

**Fig 6. Prediction accuracies of models from this study in the random Native Hawaiian and Native Hawaiian with highest Polynesian ancestry validation sets.** The PGS models were all trained from EAS-, EUR- or multi-ancestry GWAS, but using the MEC-NH for optimization. The resulting models were then validated in 200 randomly selected MEC-NH individuals and the same number of individuals with highest estimated Polynesian ancestries (minimum estimated Polynesian ancestry = 65%). We did not perform the analysis for T2D due to too few case / control samples, particularly among those with high Polynesian ancestries.

## Discussion

284 In this study we conducted a systematic assessment of the prediction accuracies and  
285 transferability of PGS models for Native Hawaiians. We assessed either PGS models constructed  
286 in this study or models that are publicly available from the PGS catalog. We focused on BMI,  
287 height, and T2D, as these are traits or diseases that showed different distributions between Native  
288 Hawaiians and other continental populations, and that Polynesian ancestries may be correlated  
289 with disease risk [15]. While we observed that EAS-trained PGS models have reduced prediction  
290 accuracy in MEC-W (the MEC cohort representing EUR ancestries) and vice versa, our results  
291 revealed that these PGS models at times showed comparable prediction accuracies in the Native  
292 Hawaiian cohort, especially for BMI and T2D. Empowered by the Native Hawaiian cohort in the  
293 Multiethnic Cohort Study (N ~ 5,300 with genome-wide genotyping array data), we were also able  
294 to evaluate whether using the MEC-NH individuals for optimizing the PGS model could improve  
295 PGS prediction accuracies for this population, even though our findings suggested limited  
296 improvements. Furthermore, because the Native Hawaiian population displays a continuum of  
297 genetic ancestry due to its colonial history, with Polynesian ancestries being the majority ancestry,  
298 we also evaluated PGS prediction accuracies as function of this ancestry. For publicly available  
299 PGS models for BMI and T2D, we did observe a reduction in prediction accuracy when applied to  
300 the Native Hawaiians most enriched with Polynesian ancestries. Our results suggest that recent  
301 admixture with European or East Asian ancestries are mediating the PGS performance, and these  
302 PGS models in general may be even less applicable to the Polynesian-ancestry populations across  
303 the Pacifics at large.

304 Across the traits, populations, and GWAS datasets that we examined here for training PGS  
305 models for Native Hawaiians, irrespective of the degree of reduction in prediction accuracy, we

306 found that training with European-based GWAS generally produced better performing PGS  
307 models. For instance, the prediction accuracy by partial  $R^2$  of height PGS model from the  
308 UKB+GIANT dataset ( $N = \sim 700,000$ ), optimized in MEC-W, was 0.198 in validation MEC-NH,  
309 compared to 0.074 for PGS model derived from BBJ+TWB GWAS data ( $N = 102,900$ ) with  
310 optimization in MEC-J (one-sided  $P < 0.001$ ; **Fig.2**). This is thus reflective of the bias in GWAS,  
311 where ancestry-specific GWAS for European-ancestry populations are still much larger, and thus  
312 more powered and informative for PGS, than East Asian-ancestry populations. Another hint of this  
313 bias can also be observed when PGS was constructed from multi-ancestry meta-analysis data. In  
314 this case, the same GWAS dataset was optimized in MEC-W or MEC-J separately, but the  
315 resulting PGS still had higher prediction accuracy in held-out MEC-W (partial  $R^2 = 0.286$ ) than  
316 MEC-J (0.199; one-sided  $P = 0.023$ ), respectively. This is potentially due to the European-ancestry  
317 populations still representing the majority of the dataset in the multi-ancestry meta-analysis  
318 ( $\sim 628,000$  European-ancestry individuals vs.  $\sim 179,000$  East Asian-ancestry individuals in Sakaue  
319 S., *et al.* [34]). Therefore, in addition to increasing sample sizes of future GWAS, increasing  
320 representation and diversity of these GWAS will also help improve the PGS accuracy, particularly  
321 for a population such as the Native Hawaiians (or African Americans and Latinos) who are not a  
322 major constituent of multi-ancestry GWAS yet. This may be particularly important since using the  
323 diverse population for optimization, without fundamentally changing the representation of the  
324 GWAS data, did not appear to make meaningful improvements (**Fig.3**).

325 While we generally advocate for greater inclusion of diverse populations in future GWAS,  
326 which both increase the sample size and the diversity of the GWAS, it could also be difficult to  
327 predict the impact on prediction accuracy of the PGS and may be dependent on the trait architecture.  
328 For instance, the same multi-ancestry meta-analysis cohort optimized in MEC-W individuals  
329 showed an improvement in prediction accuracy for BMI (partial  $R^2 = 0.104$ , compared to partial  
330  $R^2 = 0.088$  in UKB+GIANT only;  $P < 0.001$  by paired bootstrapping; **Fig.2**), but a reduction for  
331 height (partial  $R^2 = 0.286$  in multi-ancestry meta-analysis, compared to  $R^2 = 0.328$  in  
332 UKB+GIANT;  $P < 0.001$ ; **Fig.2**). For Native Hawaiians, switching from a smaller European-only  
333 GWAS to a marginally larger multi-ancestry GWAS did not improve the prediction accuracies for  
334 either trait, though the performance was comparable (partial  $R^2 = 0.081$  vs. 0.078 for BMI, 0.198  
335 vs. 0.176 for height; **Fig. 2**). It is therefore important to assess the prediction accuracy empirically,  
336 particularly for the diverse ethnic minority populations such as the Native Hawaiians.

337 In addition to sample size and diversity of the GWAS dataset for training, the size of the  
338 optimization and validation samples may also play a role in determining the transferability of the  
339 resulting PGS model. In particular, we had compared the PGS models constructed here with those  
340 publicly available on the PGS catalog (**Fig. 4**). For some traits, our models may have used larger  
341 GWAS but achieved only comparable, if not lower, prediction accuracies compared to the  
342 published PGS models. For instance, in the case of height PGS, PGS001929 [35] showed  
343 significantly better performance than our best model (partial  $R^2 = 0.236$  vs. 0.198;  $P = 0.02$  ;  
344 **Fig.4**). PGS001929 utilizes only the UKB GWAS ( $N \sim 500,000$ ) and employs the same LDpred2  
345 for PGS construction. The improved performance in PGS001929 may be attributed to a larger  
346 optimized dataset and validation sample sizes ( $N = 349,991$  and 43,631, respectively). Our  
347 observations here then suggest that the most effective study design to construct PGS for  
348 underrepresented admixed populations may be using the largest and most diverse GWAS along  
349 with a large sample for optimization. This is yet another challenge for underrepresented minority  
350 populations such as the Native Hawaiians when sample sizes are generally small.

351 In summary, our study informs on PGS performance and transferability in the Native  
352 Hawaiians and individuals with Polynesian ancestry. We found that continental-level admixture,  
353 over the last 300 years or so, may have mediated the PGS performance for these complex traits in  
354 Native Hawaiians. We again stress that our use to quantify proportion of ancestries was solely for  
355 the purpose of research use, as a means to evaluate potential disparity in the way PGS can be  
356 deployed within the Native Hawaiian population. These estimates are potentially noisy, dependent  
357 on external references used, and could induce social harm when taken out of the particular research  
358 context. In fact, one future approach to evaluate PGS performance may focus on individual-level  
359 metric, where one's genetic information is evaluated in context of genetic similarity to, say, the  
360 European cohort underlying the GWAS study[33], rather than explicit quantification of proportion  
361 from a labeled ancestry. We also found that sample size and diversity in GWAS, as well as the  
362 availability of large optimization cohort, may complicate the construction and application of PGS  
363 in underrepresented populations. This is another obstacle for Native Hawaiians, as collection and  
364 use of genetic data from indigenous populations are fraught with past misuse that led to general  
365 mistrust from the community[36–38]. For a population already small in size, the availability of  
366 cohorts to optimize these PGS models are also much smaller than that available for other  
367 continental populations, which in turn harms the community in reaping the benefits of genomic  
368 medicine. Thus, an ongoing discussion, engagement, and involvement of the community centered  
369 around issues of participation in research, genetic data collection, and data sovereignty will be  
370 required. Finally, future studies may also focus on traits and diseases that we did not study here,  
371 such as cardiovascular diseases that the Native Hawaiians are also known to be susceptible [18,39],  
372 as well as traits that the Native Hawaiian communities expressed explicit concern and should be  
373 made as research focus, such as asthma [17,30], so to further encourage community participation  
374 in research. It is with the multi-pronged strategy of inclusion in genetics research, reduction of  
375 biases, and focus on community concerns that we can reduce the disparity in PGS model  
376 performance in this case, and alleviate health disparity in general.

377

## 378 **Material and Methods**

### 379 **GWAS summary statistics and PGS Catalog datasets**

380 To comprehensively evaluate the transferability of PGS for the Native Hawaiian population,  
381 an admixed population with substantial East Asian (EAS) and European (EUR) ancestries [19],  
382 we have utilized EAS and EUR GWAS, as well as multi-ethnic GWAS, summary statistics for  
383 training PGS models for BMI, height, and T2D. We collected and curated the largest available  
384 GWAS summary statistics data from the most recent publications [32,34,40–43] (**Table S1**). In  
385 addition to training PGS models from these latest GWAS, we also obtained and tested all models  
386 from the PGS-catalog database (<http://www.pgscatalog.org/>) related to these three traits, published  
387 in the database as of 05/18/2022 (**Table S4**).

388 In all cases, we downloaded the datasets in GRCh38 coordinates or converted the coordinates  
389 to GRCh38 genome build using triple LiftOver [44] to ensure alleles are aligned in genomic  
390 regions that may have inverted between genome builds. Additionally, we verified the order of  
391 reference and alternative alleles in the GWAS summary data by comparing it to the GRCh38  
392 reference genome. We also removed the indels in the GWAS summary statistics data.

393

### 394 **Study cohorts and quality controls of individual data**

395 To optimize the PGS models for each trait, and to evaluate the prediction accuracy and  
396 transferability of each PGS model, we leveraged the individual genetic data from the Multiethnic

397 Cohort (MEC) study [27]. MEC encompasses five major ethnic groups: Japanese Americans,  
398 Native Hawaiians, African Americans, Latinos, and Non-Latino Whites, with up to approximately  
399 70,000 individuals with genome-wide array data. We utilized the subcohorts genotyped with the  
400 Illumina Multi-Ethnic Global Array (MEGA) and Global Diversity Array (GDA) arrays, in total  
401 containing 19,677 (MEGA: 5,022; GDA: 14,655) Japanese Americans (MEC-J), 11,316 (MEGA:  
402 829; GDA: 10,487) Non-Latino White (MEC-W), and 5,388 (MEGA: 4,144; GDA: 1,244) Native  
403 Hawaiians (MEC-NH). MEC-J and MEC-W subcohorts were used as benchmarks for the  
404 prediction accuracies of PGS trained and optimized in East Asian and European populations,  
405 respectively.

406 We removed population outliers for each population using the results from unsupervised  
407 ADMIXTURE v1.3.0 [45] with the 1000 Genomes Project populations to guide the interpretation  
408 of inferred ancestry components. We pruned the SNPs for linkage disequilibrium (LD) using the -  
409 -geno 0.05 and --indep-pairwise 100 10 0.1 commands in PLINK v1.9[46]. For the ADMIXTURE  
410 analysis, we set K=5, and each K was calculated for 5 repetitions. For MEC-J and MEC-W, we  
411 removed individuals admixed within the last 1-2 generations and defined a relatively unadmixed  
412 subset based on an inferred minimum of 95% genetic components of East Asian and European  
413 ancestries, respectively. While fully recognizing that genetic ancestries exist on a continuum, and  
414 any attempt to define a discrete population on the basis of inferred genetic ancestry will be arbitrary,  
415 we opted to rely on inferred genetic ancestry to define our EAS and EUR populations in alignment  
416 with the common practices in the field and with the ancestries of the source populations for the  
417 GWAS data we used. In total, we retained 18,705 individuals in MEC-J (MEGA: 4,828; GDA:  
418 13,877) and 8,532 individuals in MEC-W (MEGA: 634; GDA: 7,898) for analysis. We did not  
419 filter out any self-reported Native Hawaiian individuals on the basis of estimated genetic ancestry,  
420 since it is a well-known admixed population with a continuous cline of any major ancestry  
421 components that can be estimated [15]. Furthermore, it is the community belief that estimated  
422 genetic ancestries should not be used as an exclusion criterion for community membership and  
423 should not supplant well-established custom of self-identity or genealogical records. Therefore,  
424 we included all self-reported Native Hawaiians within the MEC as a single population, although  
425 at times we do evaluate the efficacy of PGS models for subset of MEC-NH with higher proportion  
426 of estimated Polynesian ancestry, both for a better evaluation of using PGS in realizing precision  
427 medicine at the individual level and for assessment of the generalizability of PGS models to other  
428 Polynesian-ancestry populations.

429 To avoid overfitting PGS models in validation cohort, we randomly subset the individuals  
430 into three non-overlapping groups when evaluating PGS models for BMI and height: 500  
431 individuals per population for LD reference, 3000 individuals per population for optimizing the  
432 PGS model, and 1000 individuals per population for validating the PGS model (**Fig. 1**). For T2D,  
433 we randomly selected 800 cases as well as 1500 controls for a total of 2300 individuals per  
434 population for optimization. We then used all remaining cases and controls from each cohort for  
435 validation: 3315 cases and 6700 controls for MEC-J, 496 cases and 4063 controls for MEC-W,  
436 392 cases and 549 controls for MEC-NH. T2D cases were defined based on any self-reported T2D  
437 diagnosis by a physician or medical professional, or the use of medication for treatment of diabetes,  
438 on questionnaire 1 to 5 of the MEC survey or based on Medicare claim data based on ICD-9 codes  
439 (249-250.99) or ICD-10 codes (E11.X [47,48]). using information from the phenotype file,  
440 including patient age and T2D status. This process involves tracking individuals over time,  
441 considering records across decades. If an individual's T2D status changes from negative to positive  
442 in later traces, the record is updated accordingly. Our strategy entails evaluating all available



443 records for each person across five time points. Records with missing data are excluded, ensuring  
444 the reliability of our findings. For individuals used as LD reference or as validation, we randomly  
445 selected individuals who were genotyped on the MEGA array or GDA array, respectively, for each  
446 of MEC-J, MEC-W, and MEC-NH. For individuals used in optimizing PGS model, we selected  
447 from those genotyped on the MEGA array for MEC-J and MEC-NH and from those genotyped on  
448 the GDA array for MEC-W due to availability of samples.

449

### 450 **Polygenic Score development and validation**

451 Two commonly used approaches were utilized in this study to construct the PGS model:  
452 Clumping and Thresholding (C+T) [6,49] and LDpred2 [7]. The C+T method involved clumping  
453 SNPs in LD based on  $r^2$ , and distance (kb) parameters, and thresholding SNPs based on specific  
454 thresholds of p-values [50–52]. On the other hand, LDpred2 employed the Bayesian method to  
455 estimate the effects of genetic variants on a specific trait and considered the LD information  
456 between genetic variants [53]. We followed previous studies [54] in constructing PGS models from  
457 C+T and LDpred2, with the following modifications. For the C+T, we used p-values thresholds  
458 of: 0.1, 0.2, 0.5, 0.05, 0.01, 0.005, 1e-3, 5e-4, 1e-4, 5e-5, 1e-5, 5e-6, 1e-6, 5e-7, 1e-7, 5e-8;  $r^2$   
459 values (based on the LD reference sample of 500 individuals) of: 0.2, 0.1, 0.01, 0.005, and distance  
460 in kilobases (kb) window sizes: 250, 500. Together we evaluated 128 combinations of parameters  
461 to identify the optimal PGS (by partial  $R^2$  and pseudo  $R^2$  for quantitative and dichotomous traits,  
462 respectively; see below) in the optimization sample of 3000 individuals. For LDpred2, we used a  
463 grid of values for hyper-parameters/tuning parameter - causal variants ( $\rho$ ),  $h^2$  (the SNP heritability),  
464 and sparsity (whether to fit some variant effects to exactly zero) to construct PGS. We used  $\rho$  from  
465 a sequence of 17 values from 0.01 to 1 on a log-scale, a range of  $h^2$  within  $(0.7, 1, 1.4) \times$  estimated  
466 heritability, and a binary sparsity option of either on and off (LDPred2-grid models). In addition,  
467 we tested a model assuming infinitesimal causal effects, where each variant assumed to contribute  
468 to disease risk (LDPred2-inf model). In total, we evaluated 103 PRS models using LDPred2.

469 To evaluate the association of a PGS model in either the optimizing sample or validation  
470 sampling, we evaluated a regression model using the PGS for each individual as the predictor  
471 variable and the trait or disease as response variable using R (version 4.0.0) [55]. For BMI and  
472 height, the trait was stratified by sex, and regressed against age and age<sup>2</sup>. We extracted the residuals  
473 from the model using the R package stats v3.6.2 [55] and the residuals() function, and inverse  
474 normalized the residuals using the R package norm v1.0 [55] and the qnorm() function. Finally,  
475 we merged the results from males and females. For covariates, we additionally included ten  
476 Principal Component Analysis (PCA) data to adjust for the impact due to ancestry and population  
477 structure. For T2D, we used logistic regression, with covariates age, sex, and ten principal  
478 components. The primary metric of PGS model efficacy is the partial  $R^2$  for quantitative traits and  
479 pseudo  $R^2$  for dichotomous traits. Partial  $R^2$  was calculated using the R package rsq v2.5 [56] and  
480 its function rsq.partial(). Pseudo  $R^2$  was calculated using the R package DescTools v0.99.43 [57]  
481 and its function PseudoR2(). To obtain the pseudo  $R^2$  with only the PGS score effect in the  
482 dichotomous trait, we calculate the difference in pseudo  $R^2$  between the full model (including PGS)  
483 and the partial model (without the PGS score). To obtain confidence interval for the partial or  
484 pseudo  $R^2$ , we computed the standard error from 1000 bootstrap samples. Transferability of PGS  
485 is evaluated based on differences of the partial or pseudo  $R^2$  between two populations or between  
486 two PGS models. Significance is calculated based on testing differences in mean of the partial or  
487 pseudo  $R^2$  distribution from the bootstrap samples.

488

489 **Data and code availability**

490 Genetic data utilized in this study will be available on dbGAP (accession number:  
491 phs002183.v1.p1). GWAS summary statistics were downloaded from literature, see **Table S3** for  
492 reference. For the downloaded PGS models from the PGS catalog, see **Table S4**. We built a  
493 package to incorporate the pipeline for training, optimizing, and validating the PGS models. The  
494 package is publicly available on GitHub: <https://github.com/imyingchulo/gprs>.

495

496 **Supporting information**

497 **Table S1. Parameters of the best genomic PGS models in Design I.**

498 For each combination of complex trait, GWAS dataset, and optimization cohort, this table lists the  
499 model parameters and performance (in the optimization cohort) for the best genomic PGS model.  
500 To optimize, each combination of trait and GWAS was evaluated in a grid-like search in the  
501 optimization cohort, with the best performing model among the candidate 128 C+T models and  
502 103 LDpred2 models. Across all combinations of GWAS dataset and traits, LDpred2 produced the  
503 best model based on partial  $R^2$  (for BMI and height) or pseudo  $R^2$  (for T2D) in the optimization  
504 cohort in 11 out of 14 instances.

505

506 **Table S2. Parameters of optimal genomic PGS models when optimized in MEC-NH (Design**  
507 **II).** As is the case for Table S1, but the optimization cohort is in MEC-NH in each case.

508

509 **Table S3. Details of GWAS summary statistics and references used in this study.**

510 This table provides the overview of GWAS datasets used in this study, including the data resources,  
511 cohort, SNPs, genome built, and population size.

512

513 **Table S4. Additional information of PGS models from PGS catalog evaluated in this study**

514 This table provides the references and additional information for the 39 PGS models included in  
515 this study.

516

517 **Acknowledgments**

518 We would like to thank David Conti and Hailiang Huang for discussions of the analysis and  
519 release of pre-publication summary statistics. We would also like to thank the Native Hawaiian  
520 participants in the Multiethnic Cohort that are involved in this study. The Multiethnic Cohort was  
521 funded through grants from the National Cancer Institute (U01CA164973, P01CA168530) and  
522 National Human Genome Research Institute (U01HG007397). We also would like to thank  
523 University of Hawai'i Cancer Center's Native Hawaiian Community Advisory Board for  
524 reviewing the study proposal and providing comments to earlier versions of this manuscript. This  
525 study is supported by grants from the National Human Genome Research Institute (R01HG011646  
526 to C.W.K.C.) and the Taiwan-USC Postdoctoral Fellowship from Taiwan Education Ministry.  
527 Computation for this work was supported by the University of Southern California's Center for  
528 High-Performance Computing (<https://hpcc.usc.edu>).

529

530

531

532

533

534

535 **References**

- 536 1. Tam V, Patel N, Turcotte M, Bossé Y, Paré G, Meyre D. Benefits and limitations of genome-  
537 wide association studies. *Nat Rev Genet.* 2019;20: 467–484. doi:10.1038/s41576-019-0127-1
- 538 2. Uffelmann E, Huang QQ, Munung NS, de Vries J, Okada Y, Martin AR, et al. Genome-wide  
539 association studies. *Nature Reviews Methods Primers.* 2021;1: 59. doi:10.1038/s43586-021-  
540 00056-9
- 541 3. Igo RPJ, Kinzy TG, Cooke Bailey JN. Genetic Risk Scores. *Curr Protoc Hum Genet.*  
542 2019;104: e95. doi:10.1002/cphg.95
- 543 4. Goldstein BA, Yang L, Salfati E, Assimes TL. Contemporary Considerations for  
544 Constructing a Genetic Risk Score: An Empirical Approach. *Genetic Epidemiology.*  
545 2015;39: 439–445. doi:10.1002/gepi.21912
- 546 5. Pain O, Glanville KP, Hagenars SP, Selzam S, Fürtjes AE, Gaspar HA, et al. Evaluation of  
547 polygenic prediction methodology within a reference-standardized framework. *PLoS Genet.*  
548 2021;17: e1009021. doi:10.1371/journal.pgen.1009021
- 549 6. Choi SW, Mak TS-H, O'Reilly PF. Tutorial: a guide to performing polygenic risk score  
550 analyses. *Nat Protoc.* 2020;15: 2759–2772. doi:10.1038/s41596-020-0353-1
- 551 7. Privé F, Arbel J, Vilhjálmsón BJ. LDpred2: better, faster, stronger. *Bioinformatics.*  
552 2021;36: 5424–5431. doi:10.1093/bioinformatics/btaa1029
- 553 8. Lewis CM, Vassos E. Polygenic risk scores: from research tools to clinical instruments.  
554 *Genome Medicine.* 2020;12: 44. doi:10.1186/s13073-020-00742-5
- 555 9. Torkamani A, Wineinger NE, Topol EJ. The personal and clinical utility of polygenic risk  
556 scores. *Nature Reviews Genetics.* 2018;19: 581–590. doi:10.1038/s41576-018-0018-x
- 557 10. Fullerton A.B. & Popejoy S.M. Genomics is failing on diversity. *Nature.* 2016; 161–164.
- 558 11. Peterson RE, Kuchenbaecker K, Walters RK, Chen C-Y, Popejoy AB, Periyasamy S, et al.  
559 Genome-wide Association Studies in Ancestrally Diverse Populations: Opportunities,  
560 Methods, Pitfalls, and Recommendations. *Cell.* 2019;179: 589–603.  
561 doi:10.1016/j.cell.2019.08.051
- 562 12. Duncan L, Shen H, Gelaye B, Meijssen J, Ressler K, Feldman M, et al. Analysis of polygenic  
563 risk score usage and performance in diverse human populations. *Nature Communications.*  
564 2019;10: 3328. doi:10.1038/s41467-019-11112-0
- 565 13. Martin AR, Kanai M, Kamatani Y, Okada Y, Neale BM, Daly MJ. Clinical use of current  
566 polygenic risk scores may exacerbate health disparities. *Nature Genetics.* 2019;51: 584–591.  
567 doi:10.1038/s41588-019-0379-x

- 568 14. Detailed Look at Native Hawaiian and Other Pacific Islander Groups. [cited 30 Nov 2023].  
569 Available: [https://www.census.gov/library/stories/2023/09/2020-census-dhc-a-nhpi-](https://www.census.gov/library/stories/2023/09/2020-census-dhc-a-nhpi-population.html)  
570 [population.html](https://www.census.gov/library/stories/2023/09/2020-census-dhc-a-nhpi-population.html)
- 571 15. Sun H, Lin M, Russell EM, Minster RL, Chan TF, Dinh BL, et al. The impact of global and  
572 local Polynesian genetic ancestry on complex traits in Native Hawaiians. *PLOS Genetics*.  
573 2021;17: e1009273. doi:10.1371/journal.pgen.1009273
- 574 16. Moy KL, Sallis JF, Trinidad DR, Ice CL, McEligot AJ. Health behaviors of native Hawaiian  
575 and Pacific Islander adults in California. *Asia Pac J Public Health*. 2012;24: 961–969.  
576 doi:10.1177/1010539511408068
- 577 17. Galinsky AM, Zelaya CE, Simile C, Barnes PM. Health Conditions and Behaviors of Native  
578 Hawaiian and Pacific Islander Persons in the United States, 2014. *Vital Health Stat 3*. 2017;  
579 1–99.
- 580 18. Aluli NE, Jones KL, Reyes PW, Brady SK, Tsark JU, Howard BV. Diabetes and  
581 cardiovascular risk factors in Native Hawaiians. *Hawaii Med J*. 2009;68: 152–157.
- 582 19. Madan A, Archambeau OG, Milsom VA, Goldman RL, Borckardt JJ, Grubaugh AL, et al.  
583 More than black and white: differences in predictors of obesity among Native  
584 Hawaiian/Pacific Islanders and European Americans. *Obesity (Silver Spring, Md)*. 2012;20:  
585 1325–1328. doi:10.1038/oby.2012.15
- 586 20. Native Hawaiian/Other Pacific Islander - The Office of Minority Health. [cited 4 Aug 2023].  
587 Available: <https://minorityhealth.hhs.gov/omh/browse.aspx?lvl=3&lvlid=65>
- 588 21. Haque AT, Berrington de González A, Chen Y, Haozous EA, Inoue-Choi M, Lawrence WR,  
589 et al. Cancer mortality rates by racial and ethnic groups in the United States, 2018-2020. *J*  
590 *Natl Cancer Inst*. 2023;115: 822–830. doi:10.1093/jnci/djad069
- 591 22. Taparra K, Qu V, Pollom E. Disparities in Survival and Comorbidity Burden Between Asian  
592 and Native Hawaiian and Other Pacific Islander Patients With Cancer. *JAMA Netw Open*.  
593 2022;5: e2226327. doi:10.1001/jamanetworkopen.2022.26327
- 594 23. Chiang CWK. The Opportunities and Challenges of Integrating Population Histories Into  
595 Genetic Studies for Diverse Populations: A Motivating Example From Native Hawaiians.  
596 *Frontiers in Genetics*. 2021;12. doi:10.3389/fgene.2021.643883
- 597 24. Taparra K, Miller RC, Deville CJ. Navigating Native Hawaiian and Pacific Islander Cancer  
598 Disparities From a Cultural and Historical Perspective. *JCO Oncol Pract*. 2021;17: 130–134.  
599 doi:10.1200/OP.20.00831
- 600 25. Taparra K. Pacific Islanders Searching for Inclusion in Medicine. *JAMA Health Forum*.  
601 2021;2: e210153. doi:10.1001/jamahealthforum.2021.0153

- 602 26. Lin M, Caberto C, Wan P, Li Y, Lum-Jones A, Tiirikainen M, et al. Population-specific  
603 reference panels are crucial for genetic analyses: an example of the CREBRF locus in Native  
604 Hawaiians. *Human Molecular Genetics*. 2020;29: 2275–2284. doi:10.1093/hmg/ddaa083
- 605 27. Kolonel LN, Henderson BE, Hankin JH, Nomura AM, Wilkens LR, Pike MC, et al. A  
606 multiethnic cohort in Hawaii and Los Angeles: baseline characteristics. *Am J Epidemiol*.  
607 2000;151: 346–357. doi:10.1093/oxfordjournals.aje.a010213
- 608 28. Aluli NE. Prevalence of obesity in a Native Hawaiian population. *The American Journal of*  
609 *Clinical Nutrition*. 1991;53: 1556S-1560S. doi:10.1093/ajcn/53.6.1556S
- 610 29. Maskarinec G, Grandinetti A, Matsuura G, Sharma S, Mau M, Henderson BE, et al. Diabetes  
611 prevalence and body mass index differ by ethnicity: the Multiethnic Cohort. *Ethn Dis*.  
612 2009;19: 49–55.
- 613 30. Galinsky AM, Zelaya CE, Barnes PM, Simile C. Selected Health Conditions Among Native  
614 Hawaiian and Pacific Islander Adults: United States, 2014. *NCHS Data Brief*. 2017; 1–8.
- 615 31. Lambert SA, Gil L, Jupp S, Ritchie SC, Xu Y, Buniello A, et al. The Polygenic Score  
616 Catalog as an open database for reproducibility and systematic evaluation. *Nature Genetics*.  
617 2021;53: 420–425. doi:10.1038/s41588-021-00783-5
- 618 32. Mahajan A, Spracklen CN, Zhang W, Ng MCY, Petty LE, Kitajima H, et al. Multi-ancestry  
619 genetic study of type 2 diabetes highlights the power of diverse populations for discovery  
620 and translation. *Nature Genetics*. 2022;54: 560–572. doi:10.1038/s41588-022-01058-3
- 621 33. Ding Y, Hou K, Xu Z, Pimplaskar A, Petter E, Boulier K, et al. Polygenic scoring accuracy  
622 varies across the genetic ancestry continuum. *Nature*. 2023;618: 774–781.  
623 doi:10.1038/s41586-023-06079-4
- 624 34. Sakaue S, Kanai M, Tanigawa Y, Karjalainen J, Kurki M, Koshiha S, et al. A cross-  
625 population atlas of genetic associations for 220 human phenotypes. *Nature Genetics*.  
626 2021;53: 1415–1424. doi:10.1038/s41588-021-00931-x
- 627 35. Privé F, Aschard H, Carmi S, Folkersen L, Hoggart C, O'Reilly PF, et al. Portability of 245  
628 polygenic scores when derived from the UK Biobank and applied to 9 ancestry groups from  
629 the same cohort. *The American Journal of Human Genetics*. 2022;109: 12–23.  
630 doi:10.1016/j.ajhg.2021.11.008
- 631 36. Hudson M, Garrison NA, Sterling R, Caron NR, Fox K, Yracheta J, et al. Rights, interests  
632 and expectations: Indigenous perspectives on unrestricted access to genomic data. *Nature*  
633 *Reviews Genetics*. 2020;21: 377–384. doi:10.1038/s41576-020-0228-x
- 634 37. Kwan P, Briand G, Lee C, Lepule J, Llave K, Pang K, et al. Reservations to Participate in  
635 Biospecimen Research among Pacific Islanders. *Calif J Health Promot*. 2015;13: 27–33.



- 636 38. Garrison NA, Hudson M, Ballantyne LL, Garba I, Martinez A, Taulii M, et al. Genomic  
637 Research Through an Indigenous Lens: Understanding the Expectations. *Annu Rev*  
638 *Genomics Hum Genet.* 2019;20: 495–517. doi:10.1146/annurev-genom-083118-015434
- 639 39. Mau MK, Sinclair K, Saito EP, Baumhofer KN, Kaholokula JK. Cardiometabolic health  
640 disparities in native Hawaiians and other Pacific Islanders. *Epidemiol Rev.* 2009;31: 113–  
641 129. doi:10.1093/ajerev/mxp004
- 642 40. Akiyama M, Okada Y, Kanai M, Takahashi A, Momozawa Y, Ikeda M, et al. Genome-wide  
643 association study identifies 112 new loci for body mass index in the Japanese population.  
644 *Nature Genetics.* 2017;49: 1458–1467. doi:10.1038/ng.3951
- 645 41. Yengo L, Sidorenko J, Kemper KE, Zheng Z, Wood AR, Weedon MN, et al. Meta-analysis  
646 of genome-wide association studies for height and body mass index in ~700000 individuals  
647 of European ancestry. *Hum Mol Genet.* 2018;27: 3641–3649. doi:10.1093/hmg/ddy271
- 648 42. Akiyama M, Ishigaki K, Sakaue S, Momozawa Y, Horikoshi M, Hirata M, et al.  
649 Characterizing rare and low-frequency height-associated variants in the Japanese population.  
650 *Nature Communications.* 2019;10: 4393. doi:10.1038/s41467-019-12276-5
- 651 43. Chia-Yen Chen, Tzu-Ting Chen, Yen-Chen Anne Feng, Ryan J. Longchamps, Shu-Chin Lin,  
652 Shi-Heng Wang, et al. Analysis across Taiwan Biobank, Biobank Japan and UK Biobank  
653 identifies hundreds of novel loci for 36 quantitative traits. *medRxiv.* 2021;  
654 2021.04.12.21255236. doi:10.1101/2021.04.12.21255236
- 655 44. Sheng X, Xia L, Cahoon JL, Conti DV, Haiman CA, Kachuri L, et al. Inverted genomic  
656 regions between reference genome builds in humans impact imputation accuracy and  
657 decrease the power of association testing. *HGG Adv.* 2023;4: 100159.  
658 doi:10.1016/j.xhgg.2022.100159
- 659 45. Alexander DH, Novembre J, Lange K. Fast model-based estimation of ancestry in unrelated  
660 individuals. *Genome Res.* 2009;19: 1655–1664. doi:10.1101/gr.094052.109
- 661 46. Purcell S, Neale B, Todd-Brown K, Thomas L, Ferreira MAR, Bender D, et al. PLINK: a  
662 tool set for whole-genome association and population-based linkage analyses. *Am J Hum*  
663 *Genet.* 2007;81: 559–575. doi:10.1086/519795
- 664 47. Polfus LM, Darst BF, Highland H, Sheng X, Ng MCY, Below JE, et al. Genetic discovery  
665 and risk characterization in type 2 diabetes across diverse populations. *HGG Adv.* 2021;2:  
666 100029. doi:10.1016/j.xhgg.2021.100029
- 667 48. Maskarinec G, Brown SM, Lee J, Bogumil D, Walsh C, Haiman CA, et al. Association of  
668 Obesity and Type 2 Diabetes with Non-Hodgkin Lymphoma: The Multiethnic Cohort.  
669 *Cancer Epidemiol Biomarkers Prev.* 2023; EPI-23-0565. doi:10.1158/1055-9965.EPI-23-  
670 0565

- 671 49. Collister JA, Liu X, Clifton L. Calculating Polygenic Risk Scores (PRS) in UK Biobank: A  
672 Practical Guide for Epidemiologists. *Front Genet.* 2022;13: 818574.  
673 doi:10.3389/fgene.2022.818574
- 674 50. Finucane HK, Bulik-Sullivan B, Gusev A, Trynka G, Reshef Y, Loh P-R, et al. Partitioning  
675 heritability by functional annotation using genome-wide association summary statistics.  
676 *Nature Genetics.* 2015;47: 1228–1235. doi:10.1038/ng.3404
- 677 51. Yang J, Manolio TA, Pasquale LR, Boerwinkle E, Caporaso N, Cunningham JM, et al.  
678 Genome partitioning of genetic variation for complex traits using common SNPs. *Nature*  
679 *Genetics.* 2011;43: 519–525. doi:10.1038/ng.823
- 680 52. Ge T, Chen C-Y, Ni Y, Feng Y-CA, Smoller JW. Polygenic prediction via Bayesian  
681 regression and continuous shrinkage priors. *Nature Communications.* 2019;10: 1776.  
682 doi:10.1038/s41467-019-09718-5
- 683 53. Vilhjálmsson BJ, Yang J, Finucane HK, Gusev A, Lindström S, Ripke S, et al. Modeling  
684 Linkage Disequilibrium Increases Accuracy of Polygenic Risk Scores. *The American*  
685 *Journal of Human Genetics.* 2015;97: 576–592. doi:10.1016/j.ajhg.2015.09.001
- 686 54. Jeon S, Lo YC, Morimoto LM, Metayer C, Ma X, Wiemels JL, et al. Evaluating genomic  
687 polygenic risk scores for childhood acute lymphoblastic leukemia in Latinos. *Human*  
688 *Genetics and Genomics Advances.* 2023;4: 100239. doi:10.1016/j.xhgg.2023.100239
- 689 55. R Core Team. R: A language and environment for statistical computing. R Foundation for  
690 Statistical Computing, Vienna, Austria. 2023.
- 691 56. Zhang D. rsq: R-Squared and Related Measures. 2022. Available: [https://cran.r-](https://cran.r-project.org/web/packages/rsq/index.html)  
692 [project.org/web/packages/rsq/index.html](https://cran.r-project.org/web/packages/rsq/index.html)
- 693 57. Signorell A, Aho K, Alfons A, Anderegg N, Aragon T, Arachchige C, et al. DescTools:  
694 Tools for Descriptive Statistics. 2023. Available: [https://cran.r-](https://cran.r-project.org/web/packages/DescTools/index.html)  
695 [project.org/web/packages/DescTools/index.html](https://cran.r-project.org/web/packages/DescTools/index.html)
- 696  
697

## GWAS summary statistics

## MEC dataset

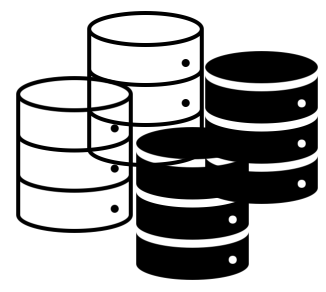

Collect the largest GWAS summary statistics currently publicly available

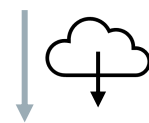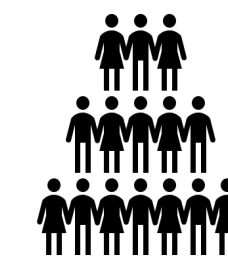

Selected cohorts:

MEC – Japanese

MEC – White

MEC – Native Hawaiian

Subset individuals

### GWAS summary traits

BMI

HEIGHT

T2D

### Cohorts

BBJ, BBJ+TWB, UKB+GIANT, META

BBJ, BBJ+TWB, UKB+GIANT, META

DIAMANTE (EAS, EUR, META)

### LD reference

500 individuals

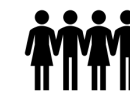

### PGS optimization

3000 individuals

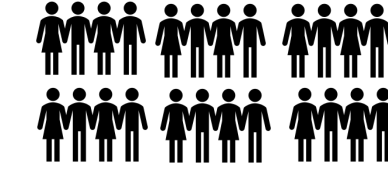

### PGS validation

1000 individuals

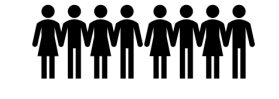

## Design I: optimized PGS in EAS/EUR

medRxiv preprint doi: <https://doi.org/10.1101/2023.12.25.23300499>; this version posted December 28, 2023. The copyright holder for this preprint (which was not certified by peer review) is the author/funder, who has granted medRxiv a license to display the preprint in perpetuity. It is made available under a [CC-BY-NC-ND 4.0 International license](https://creativecommons.org/licenses/by-nc-nd/4.0/).

It is made available under a [CC-BY-NC-ND 4.0 International license](https://creativecommons.org/licenses/by-nc-nd/4.0/).

Evaluate Transferability of PGS to NH (Fig. 2)

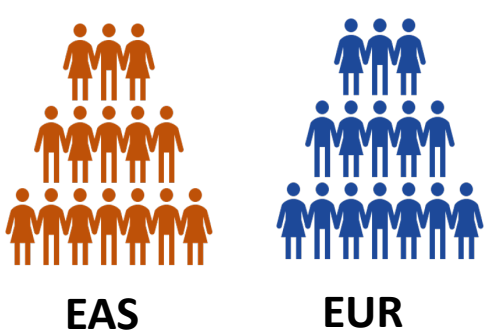

EAS

EUR

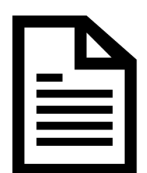

GWAS summary statistics

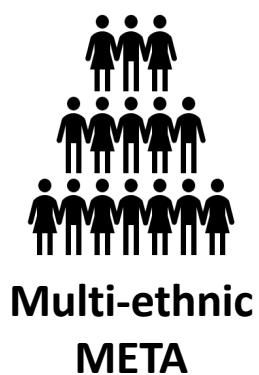

Multi-ethnic  
META

LD ref  
500 individuals

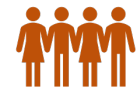

PGS optimization  
3000 individuals

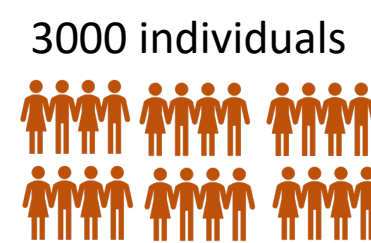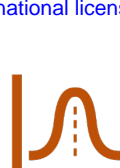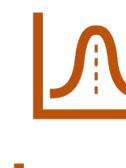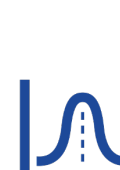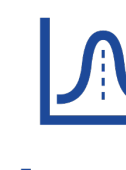

Select the best PGS optimized  
in MEC-J

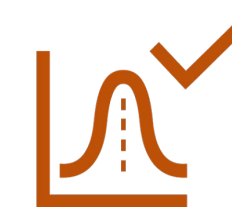

Select the best PGS optimized  
in MEC-W

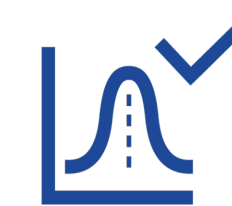

LD ref  
500 individuals

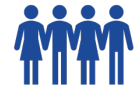

PGS optimization  
3000 individuals

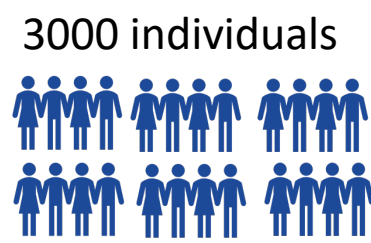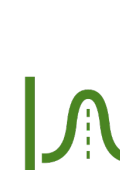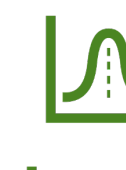

Select the best PGS optimized  
in MEC-J

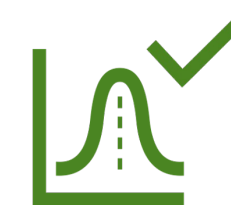

PGS validation  
1000 individuals

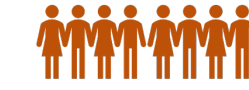

PGS validation  
1000 individuals

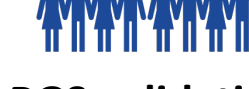

PGS validation  
1000 individuals

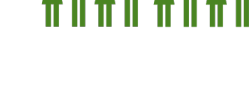

PGS validation  
1000 individuals

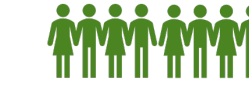

Evaluate Potential  
Improvement of PGS for NH  
(Fig. 3)

## Design II: optimized PGS in Native Hawaiians

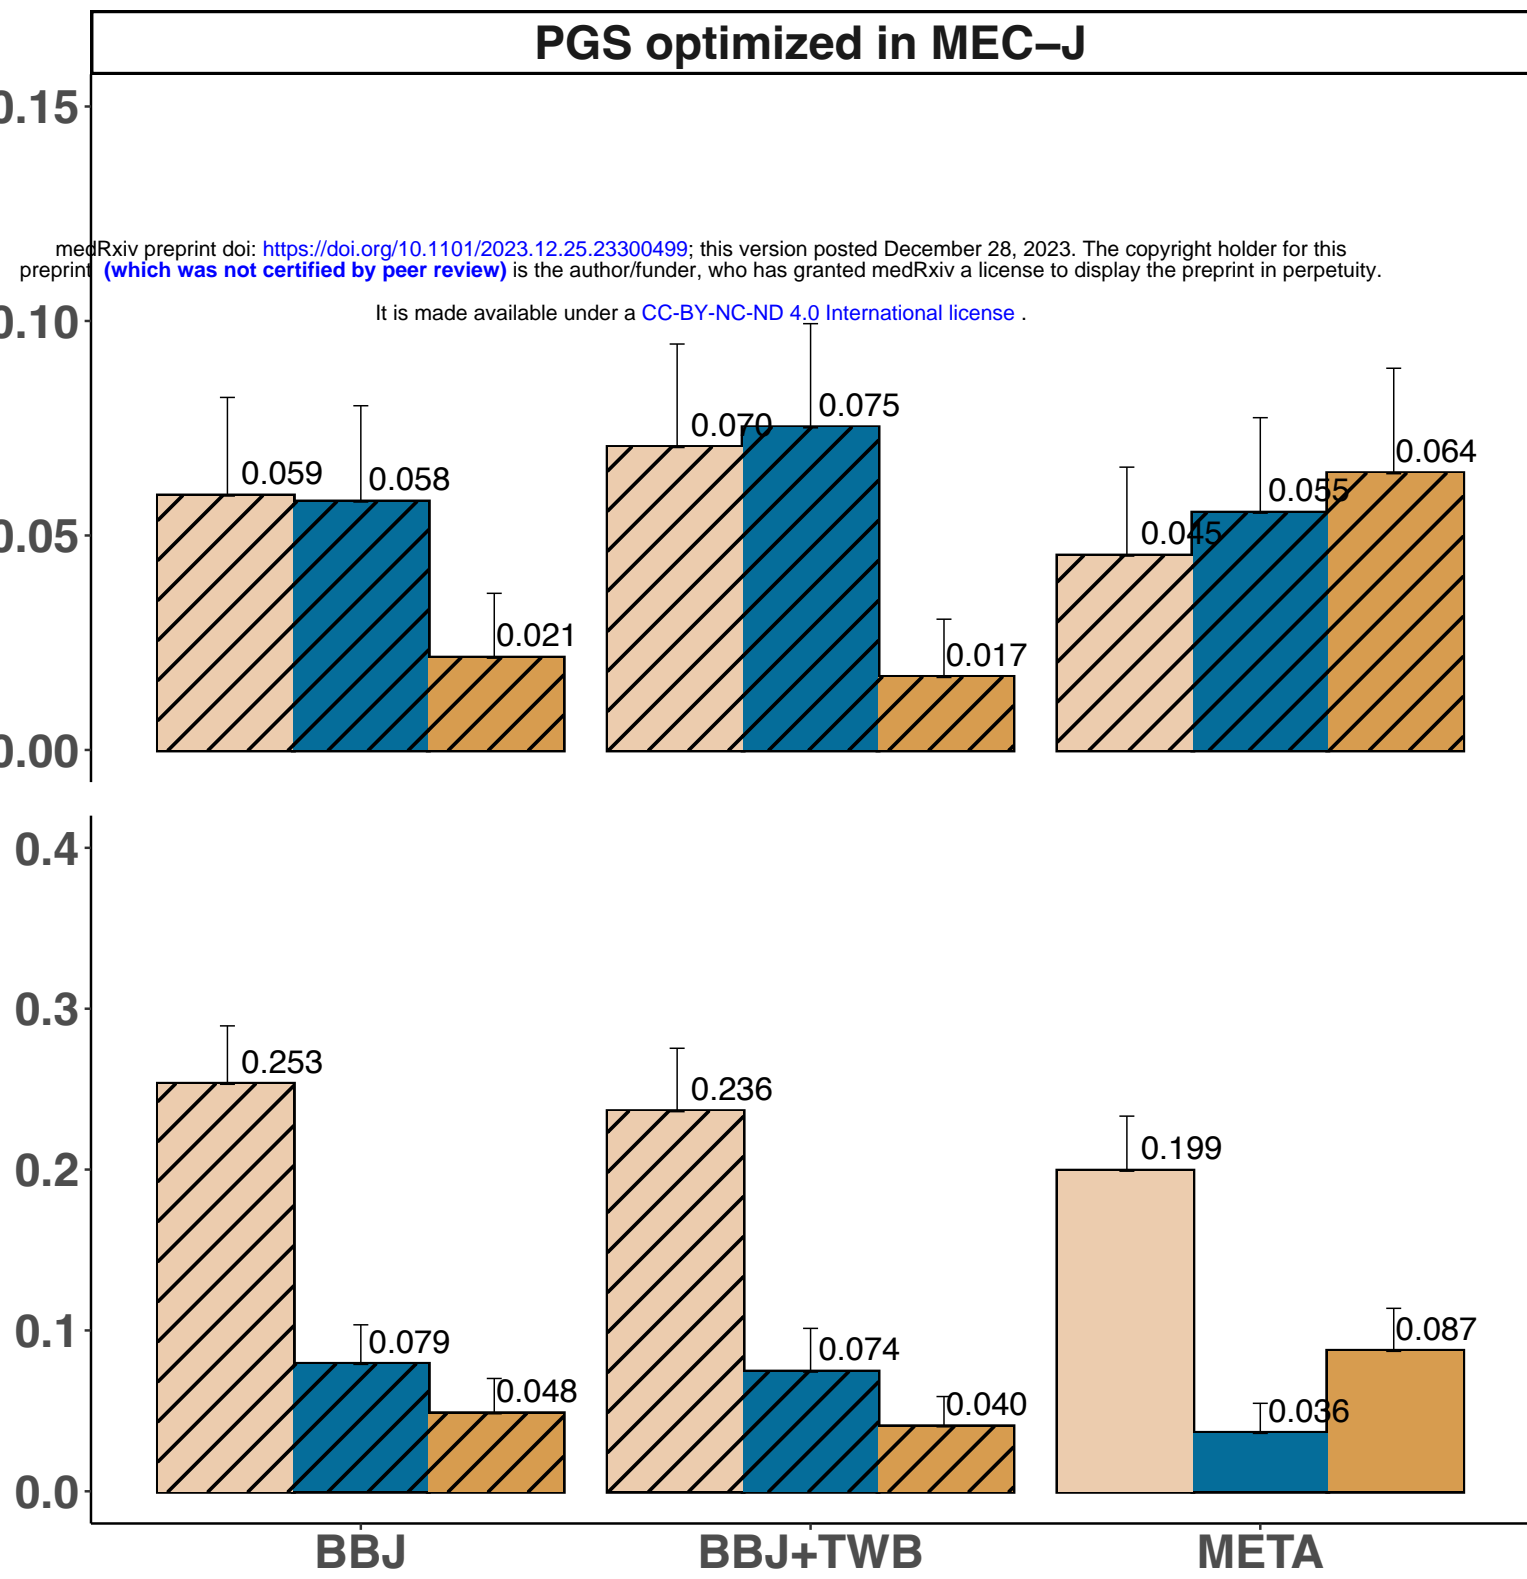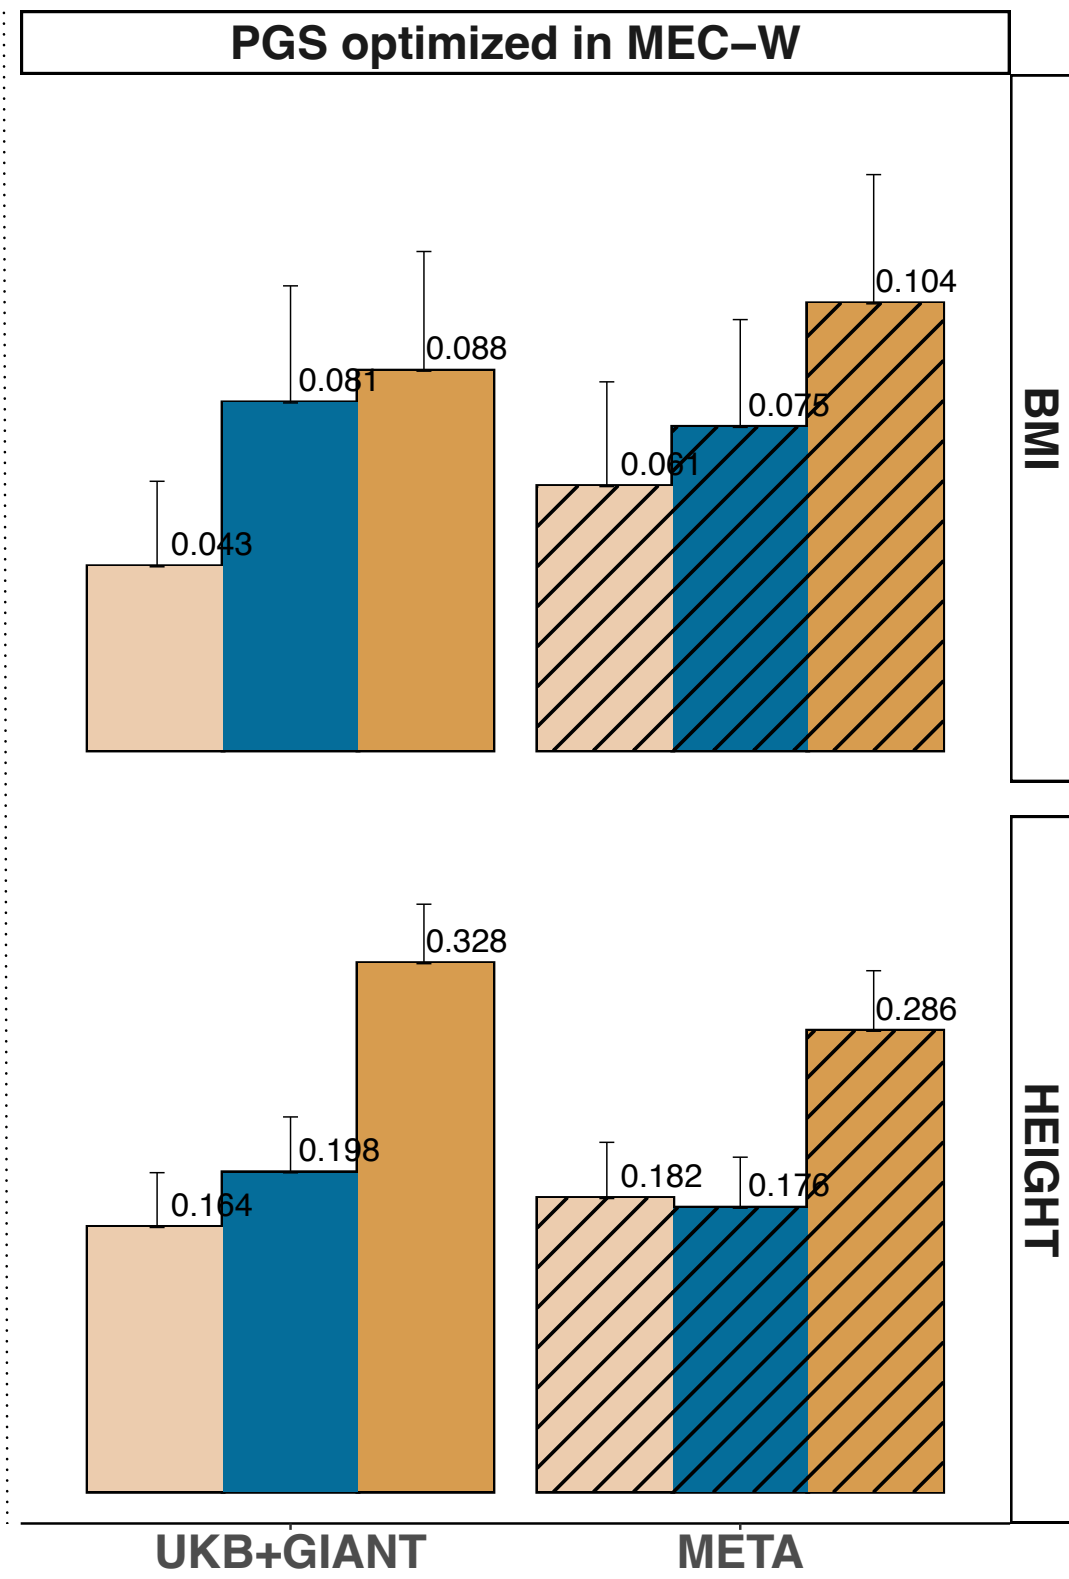

**PGS validated**

- MEC-J
- MEC-NH
- MEC-W

**PGS approach**

- LDpred2
- C+T

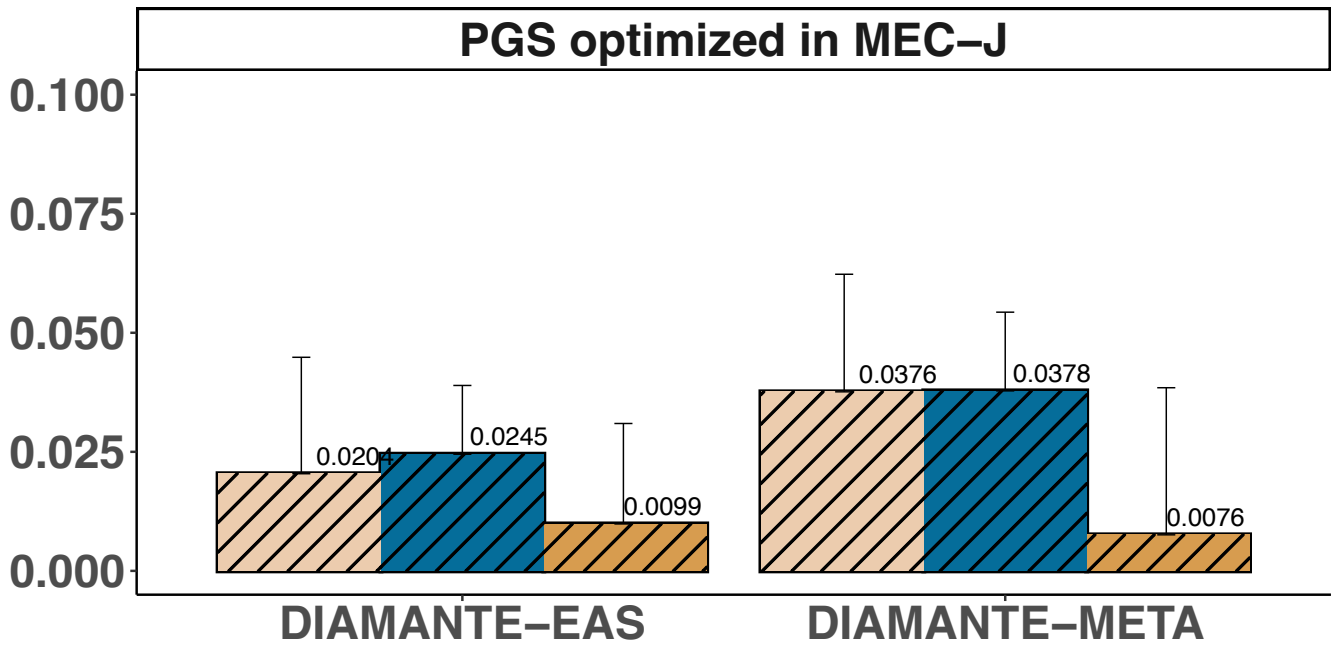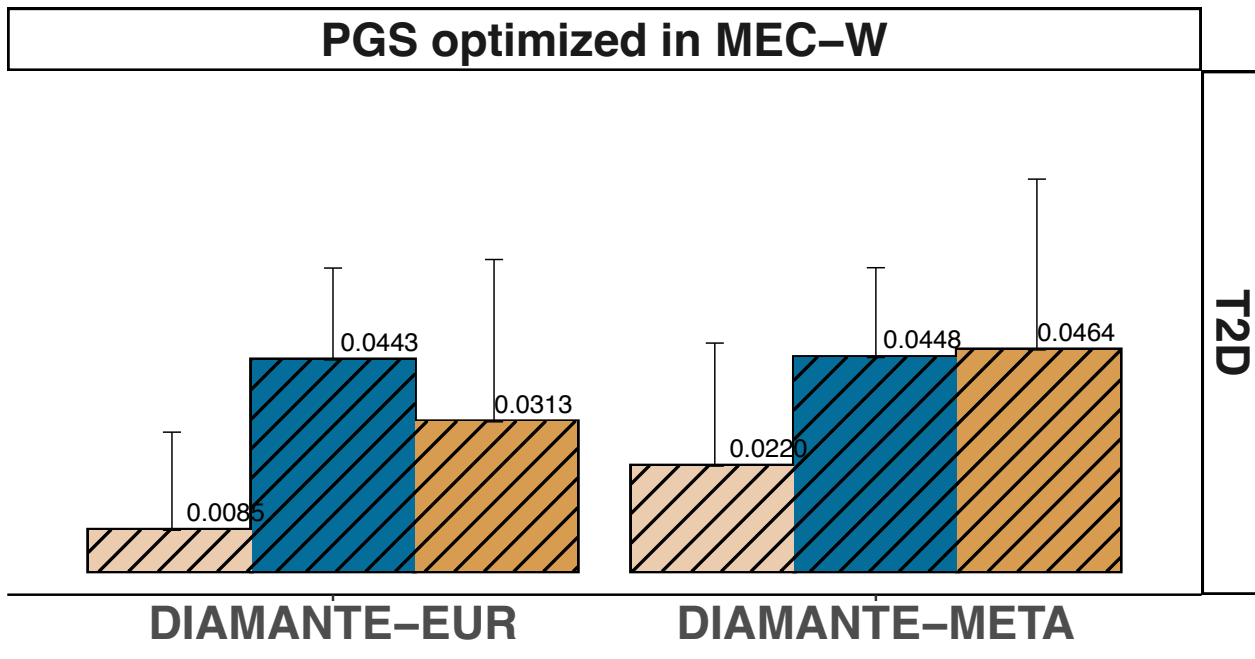

**T2D**

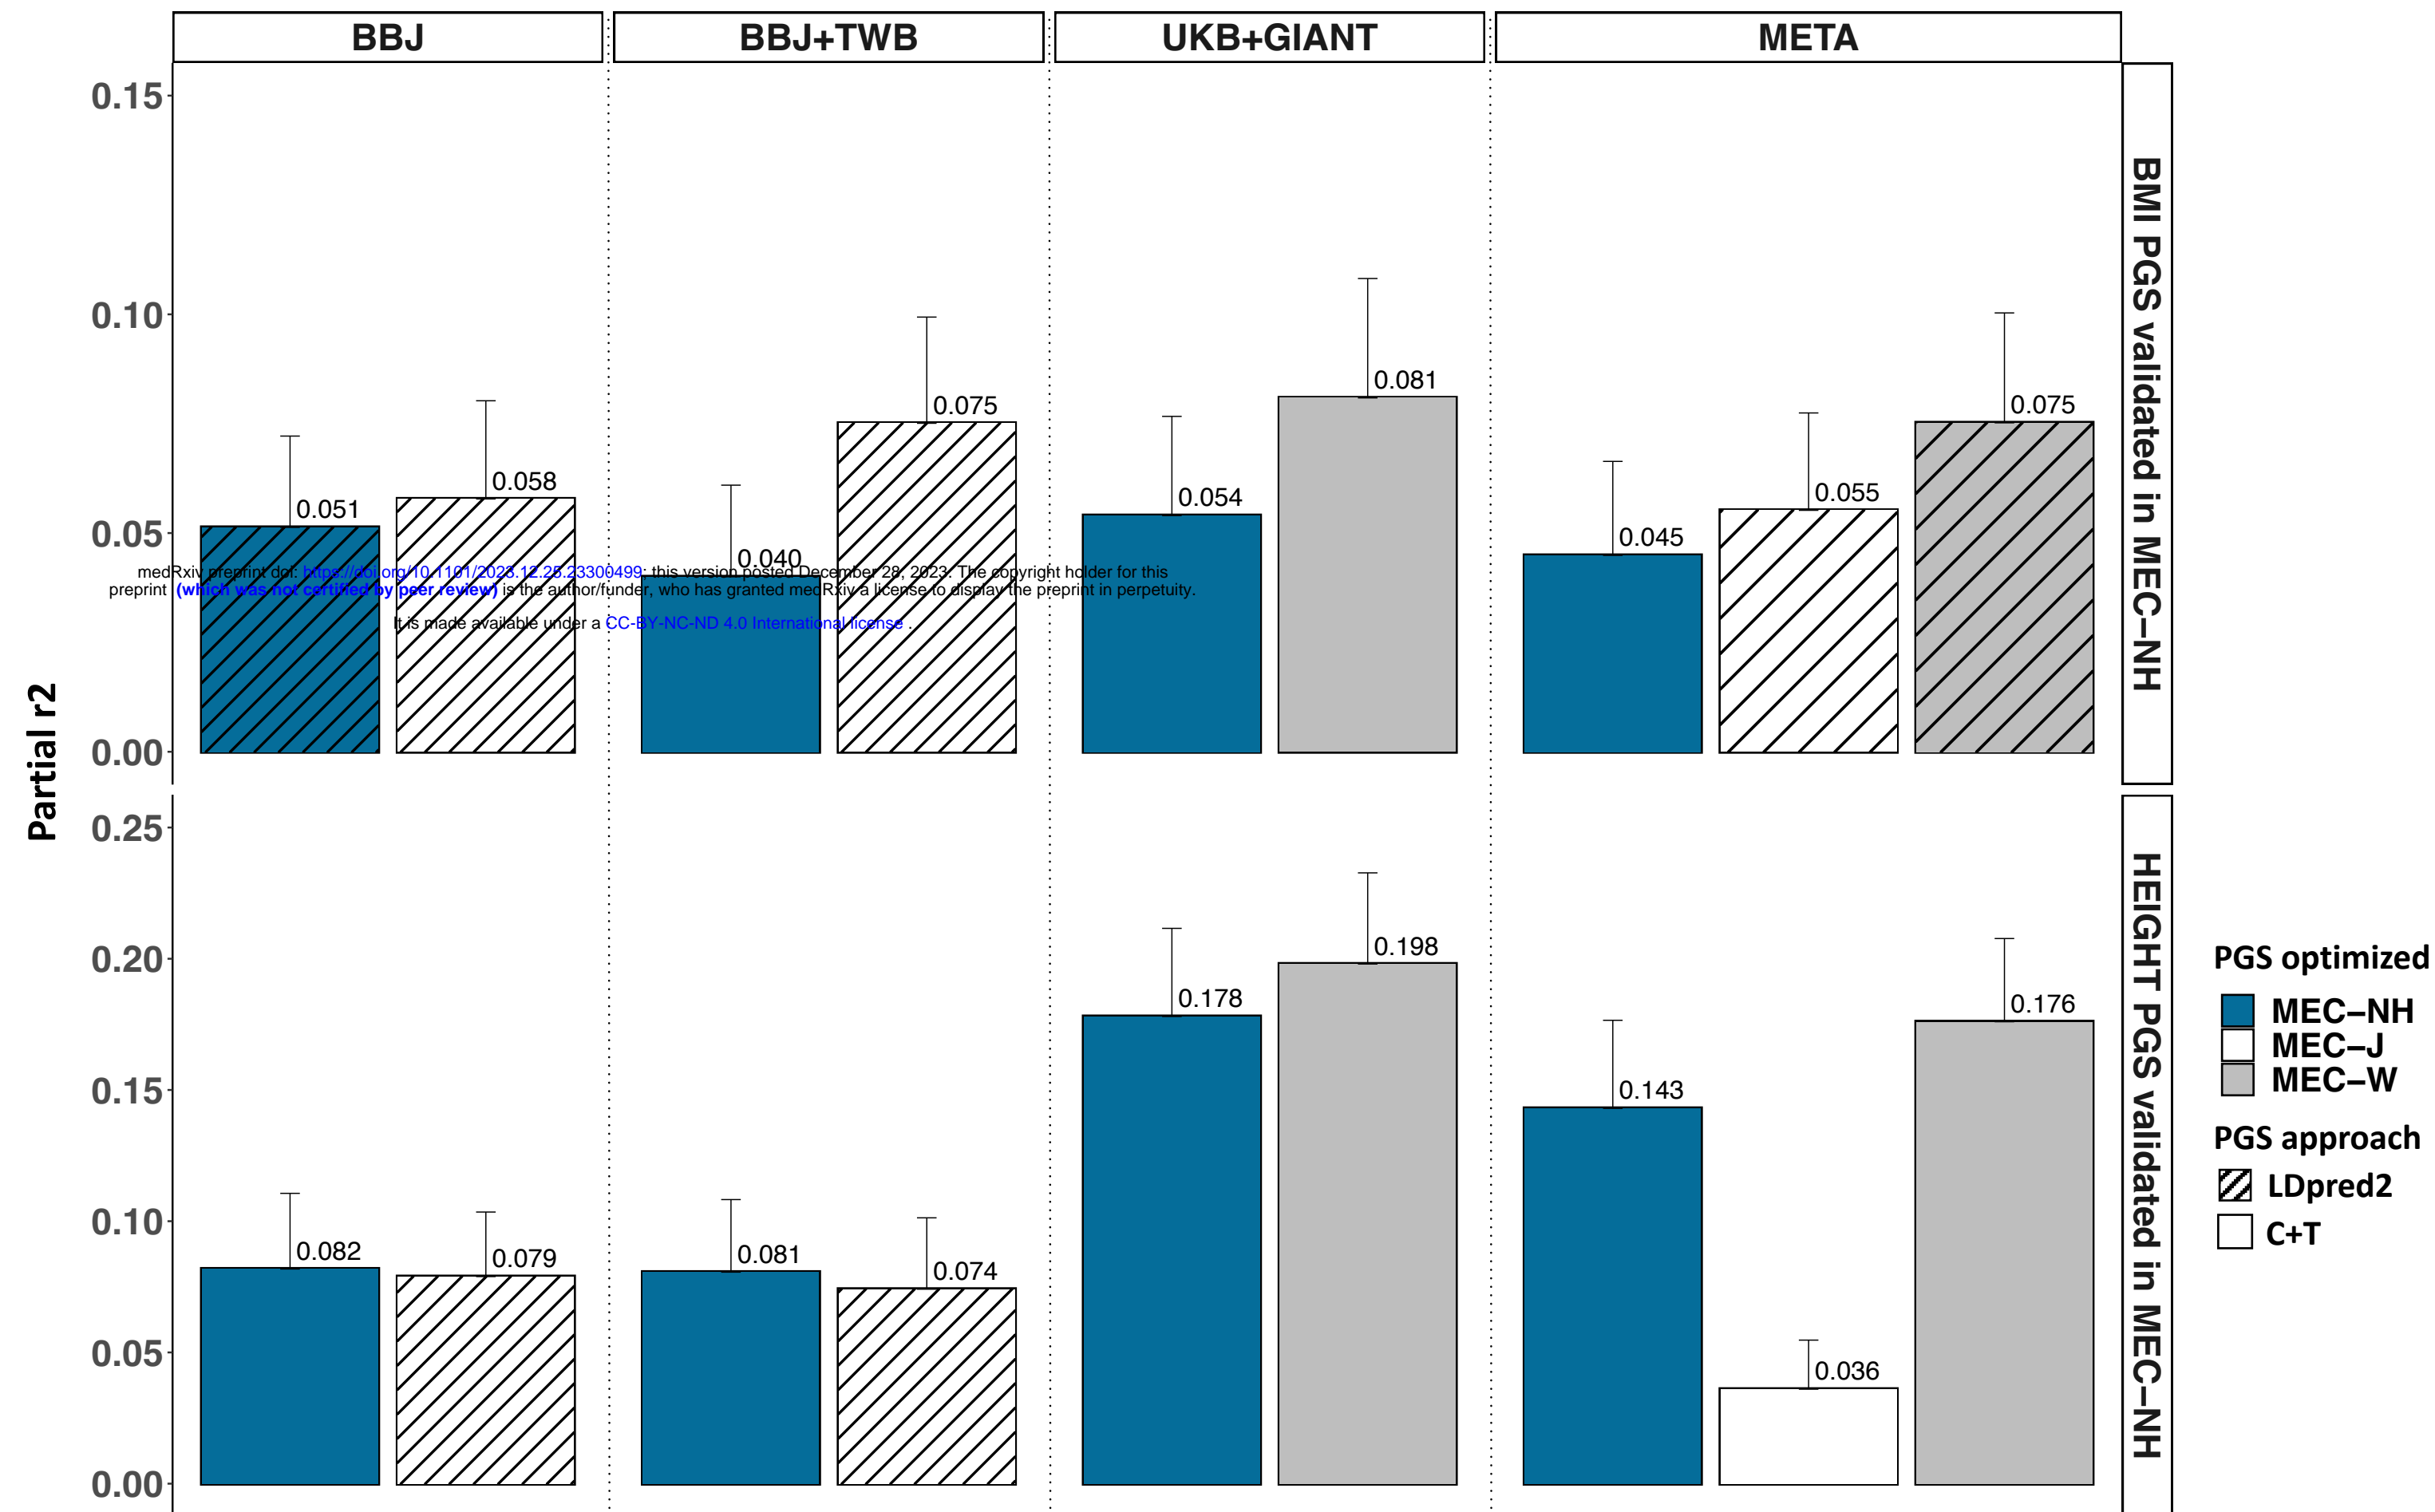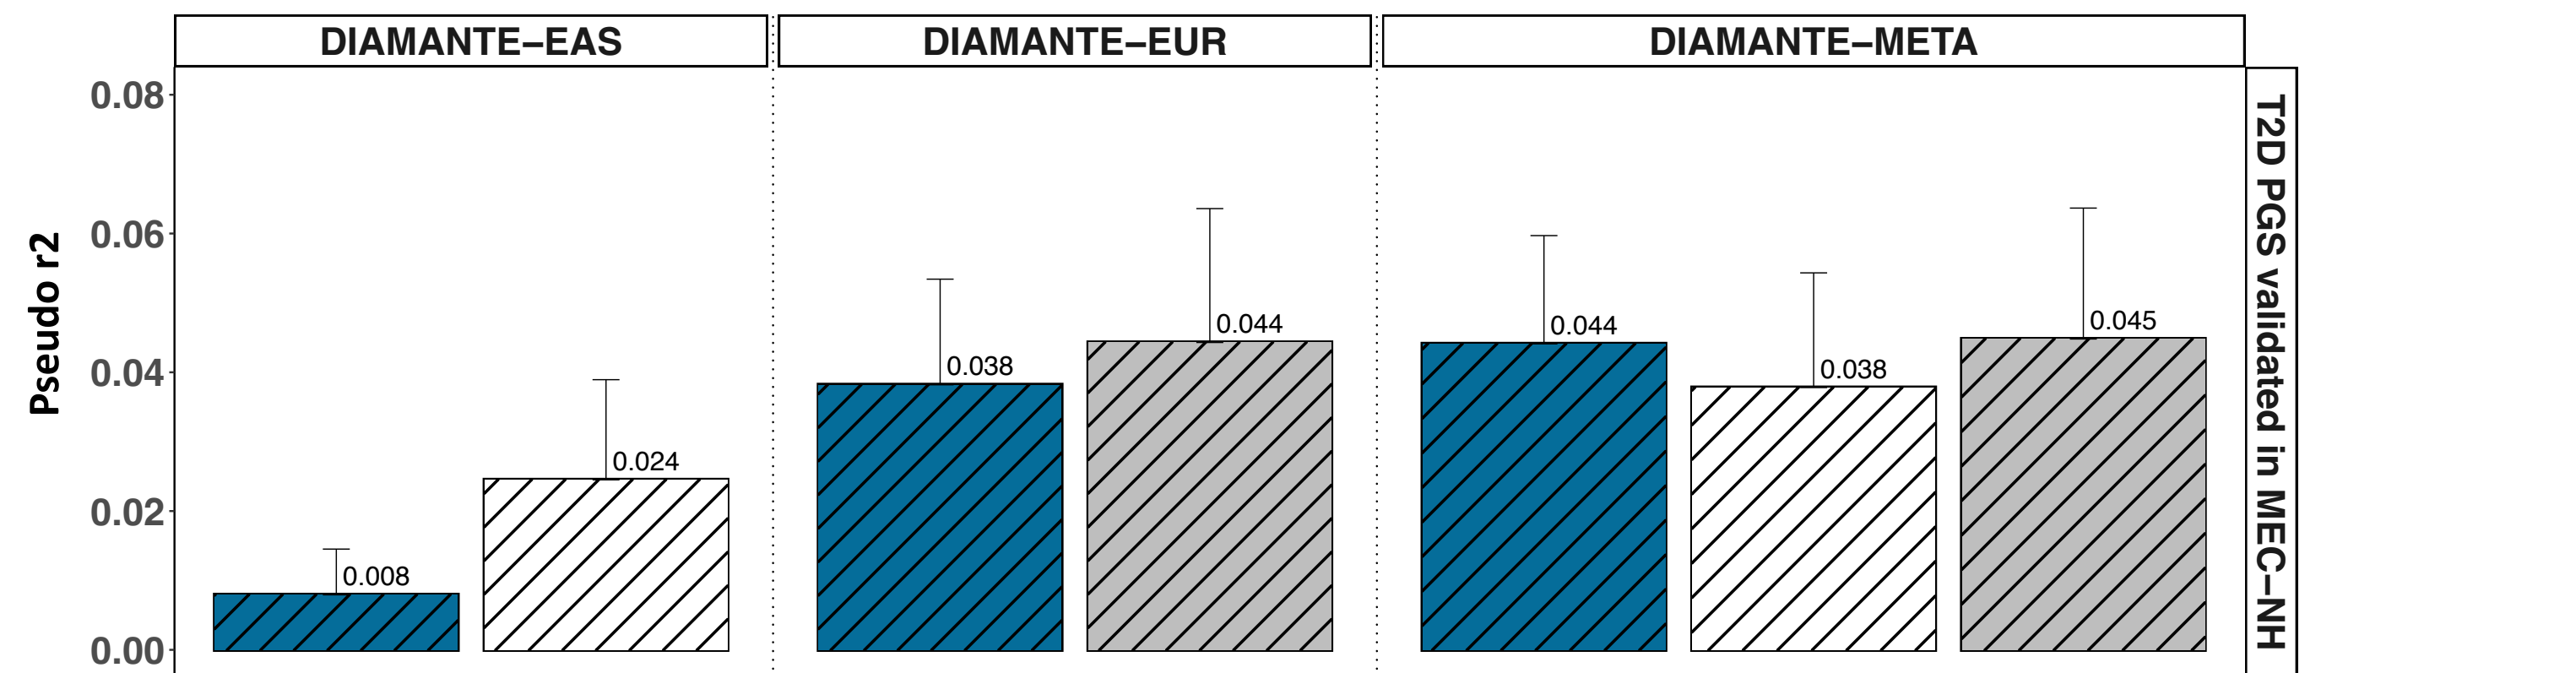



### BMI validated in MEC-NH

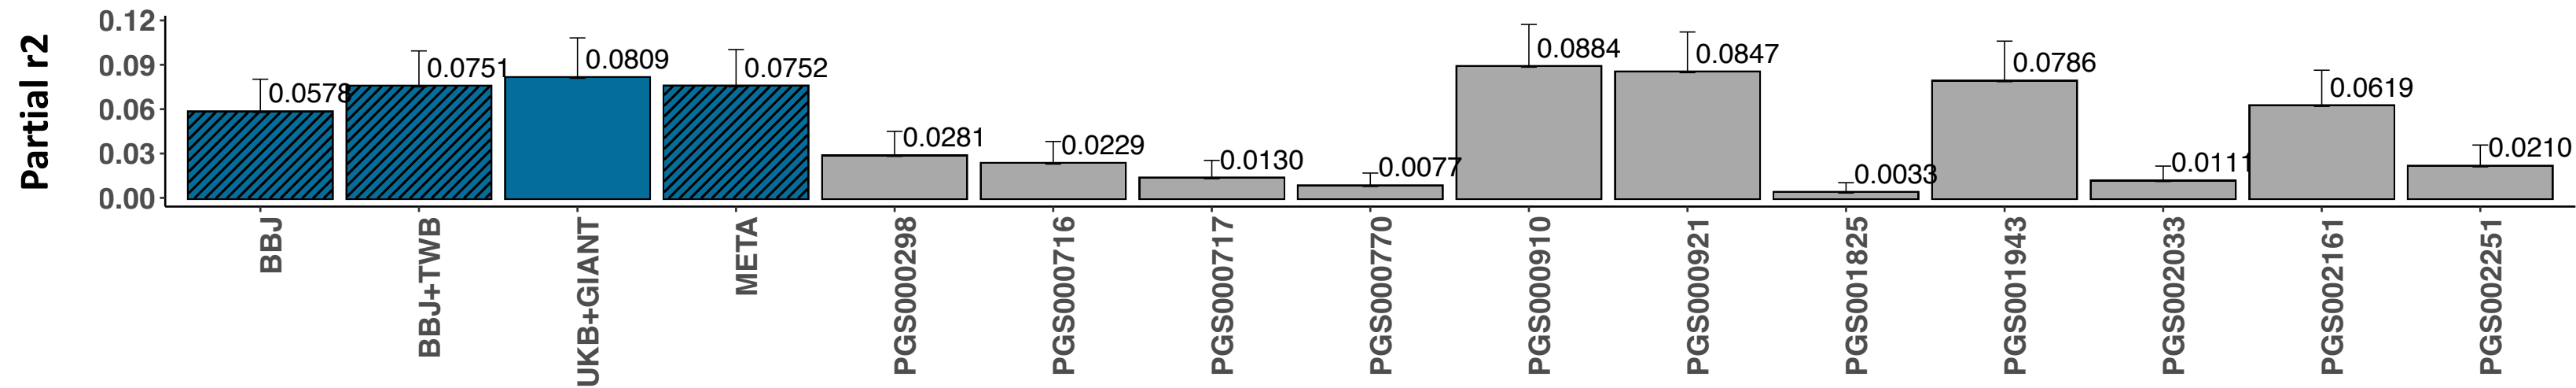

### HEIGHT validated in MEC-NH

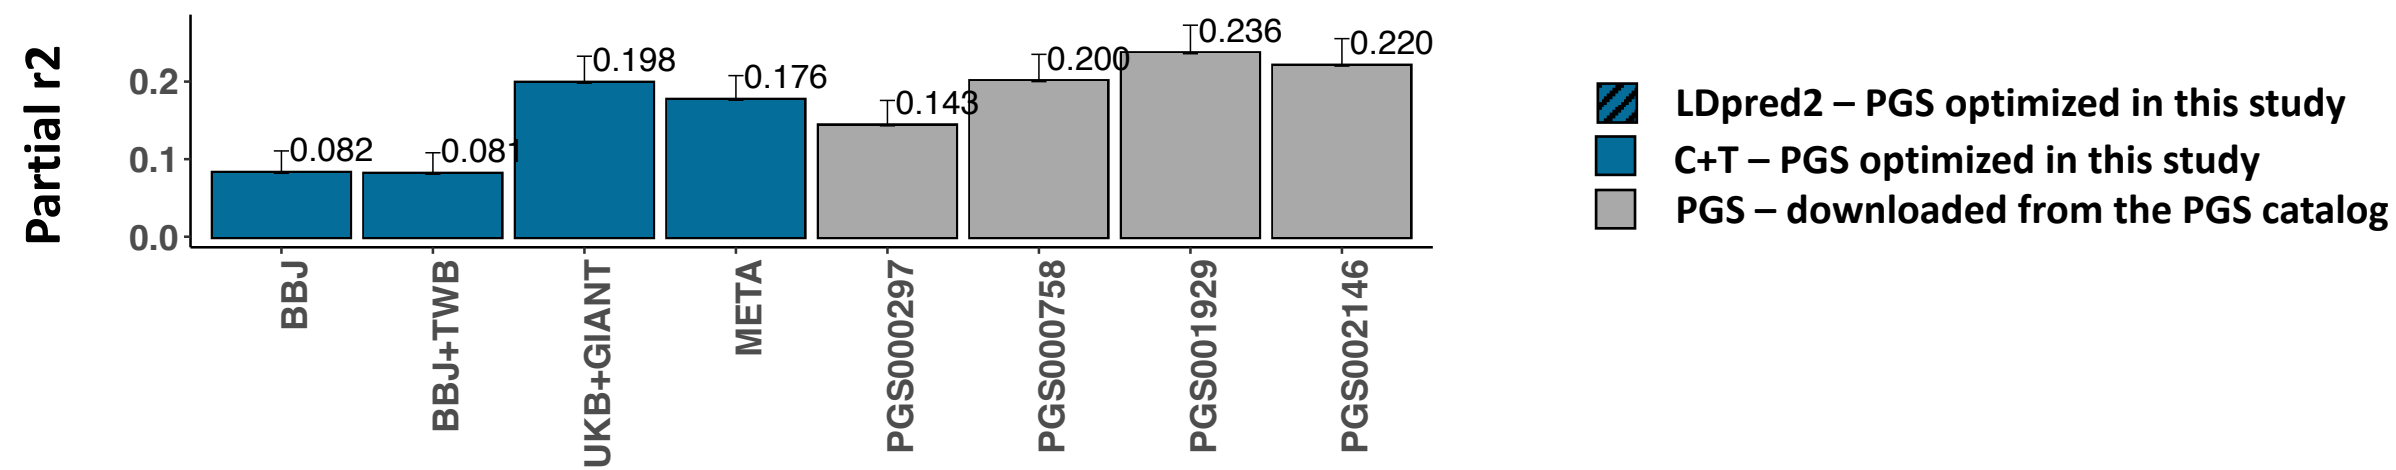

### T2D validated in MEC-NH

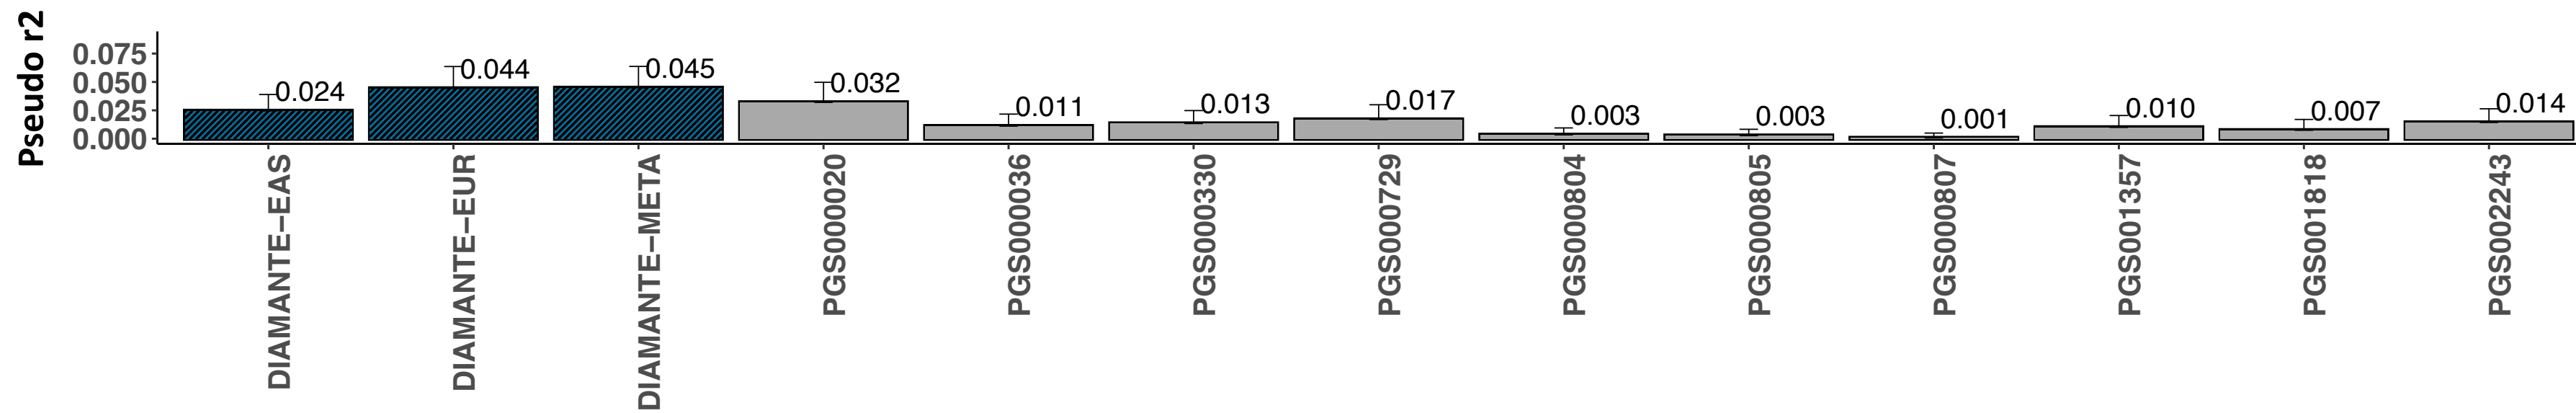

### BMI PGS validated in MEC-NH

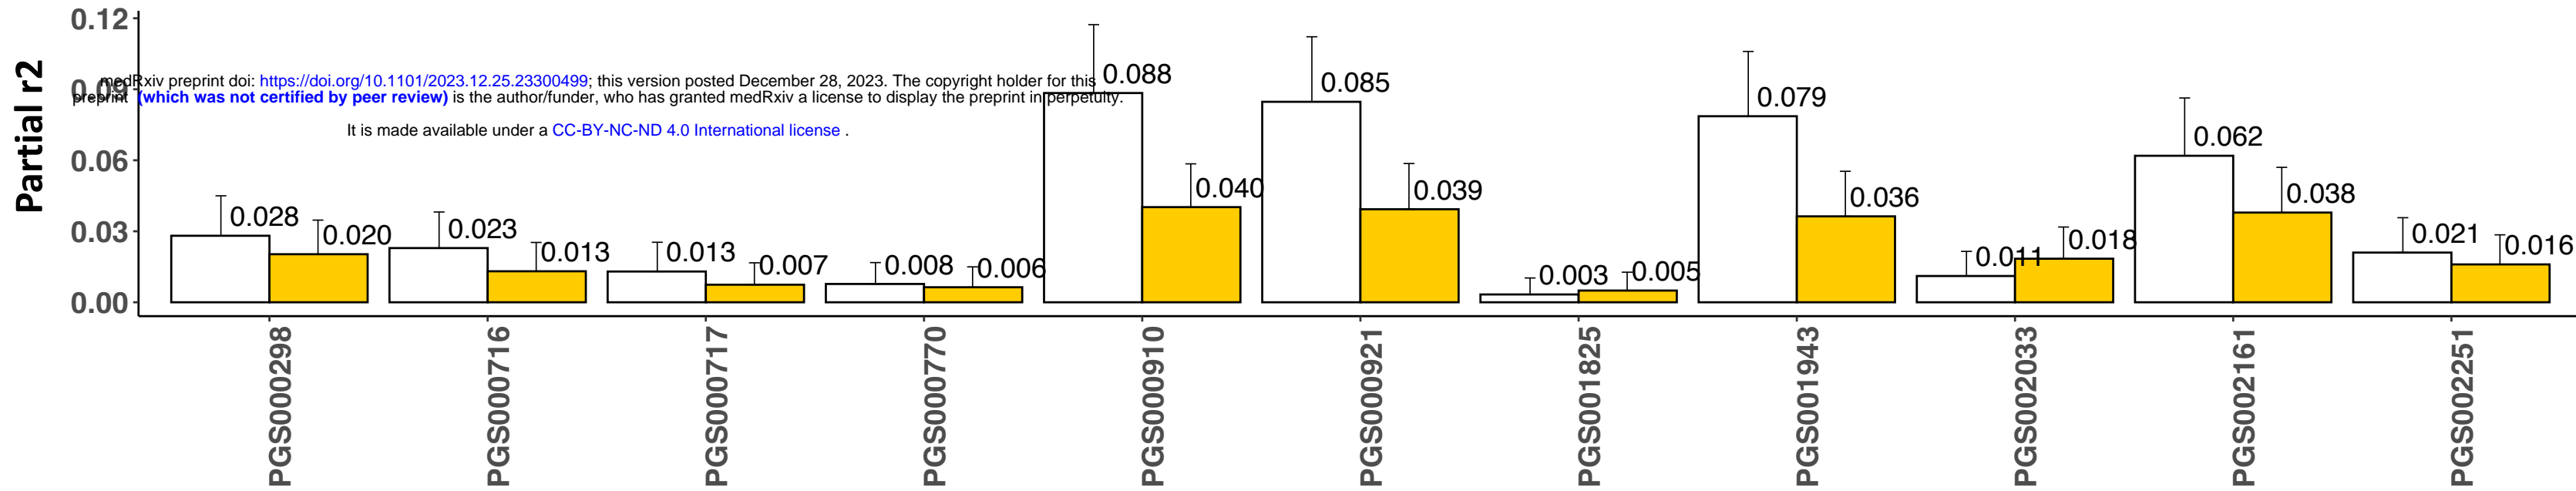

### HEIGHT PGS validated in MEC-NH

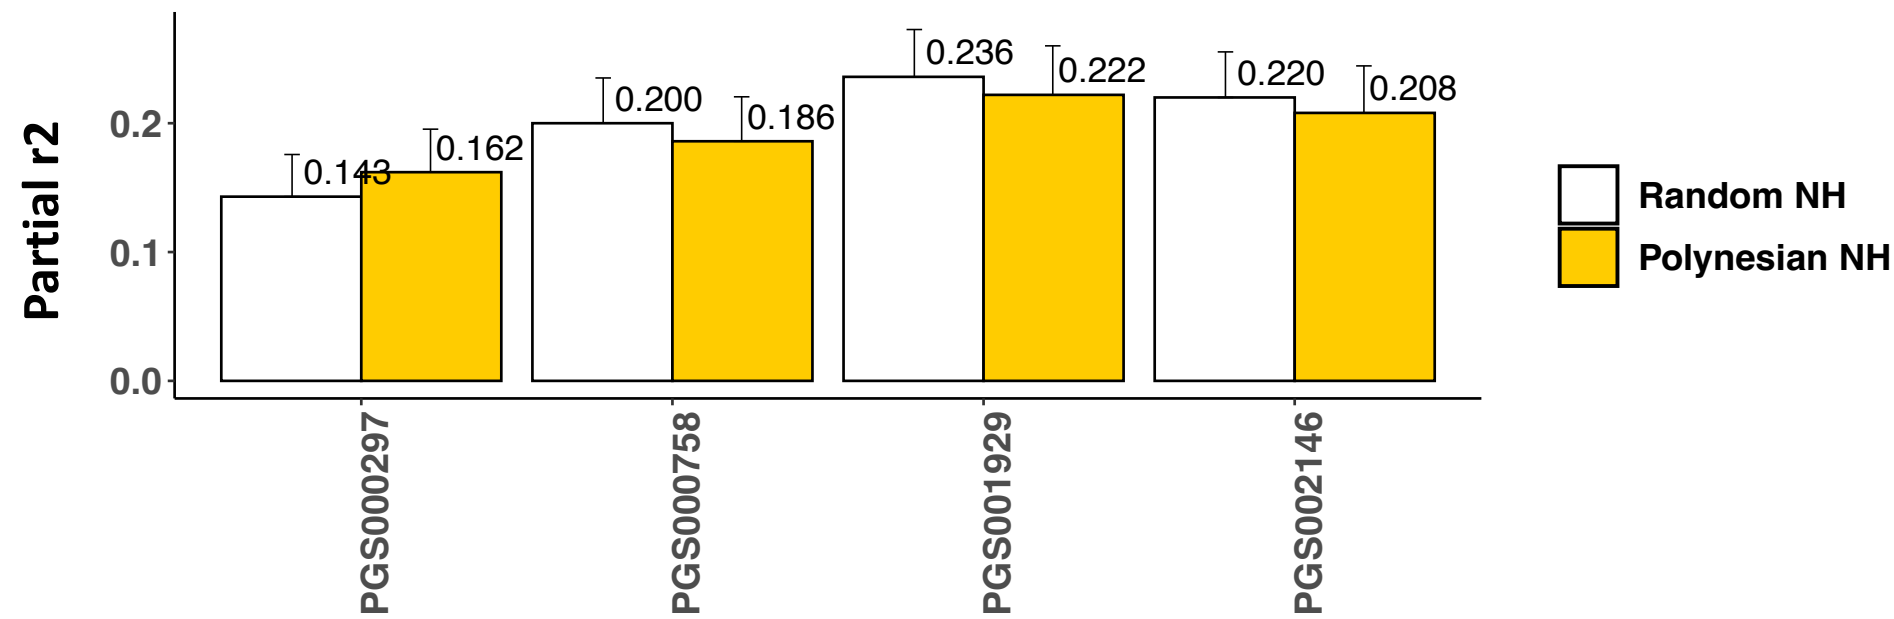

### T2D PGS validated in MEC-NH

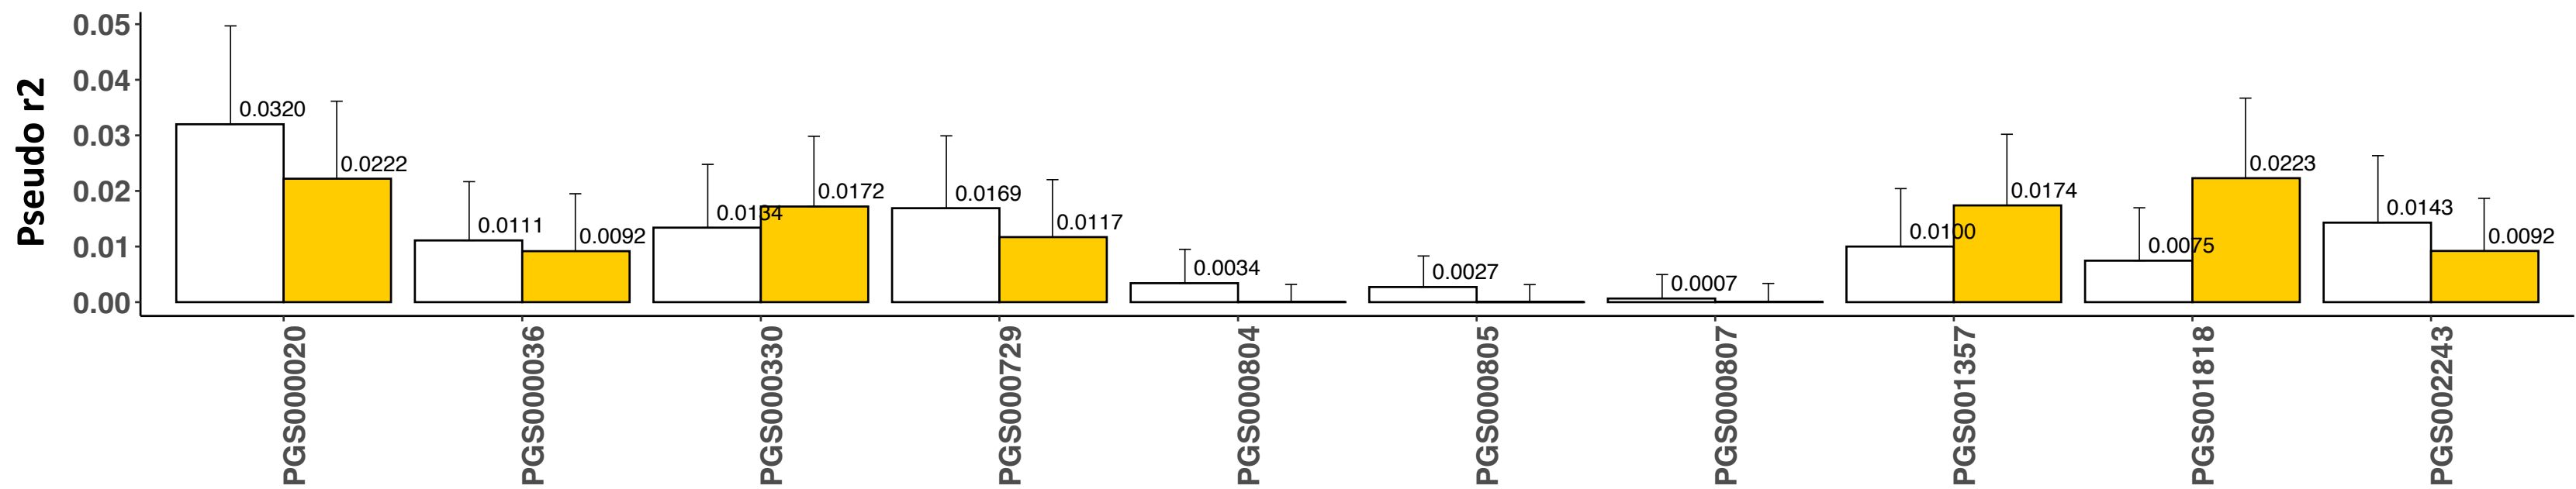

# PGS validated in MEC-NH

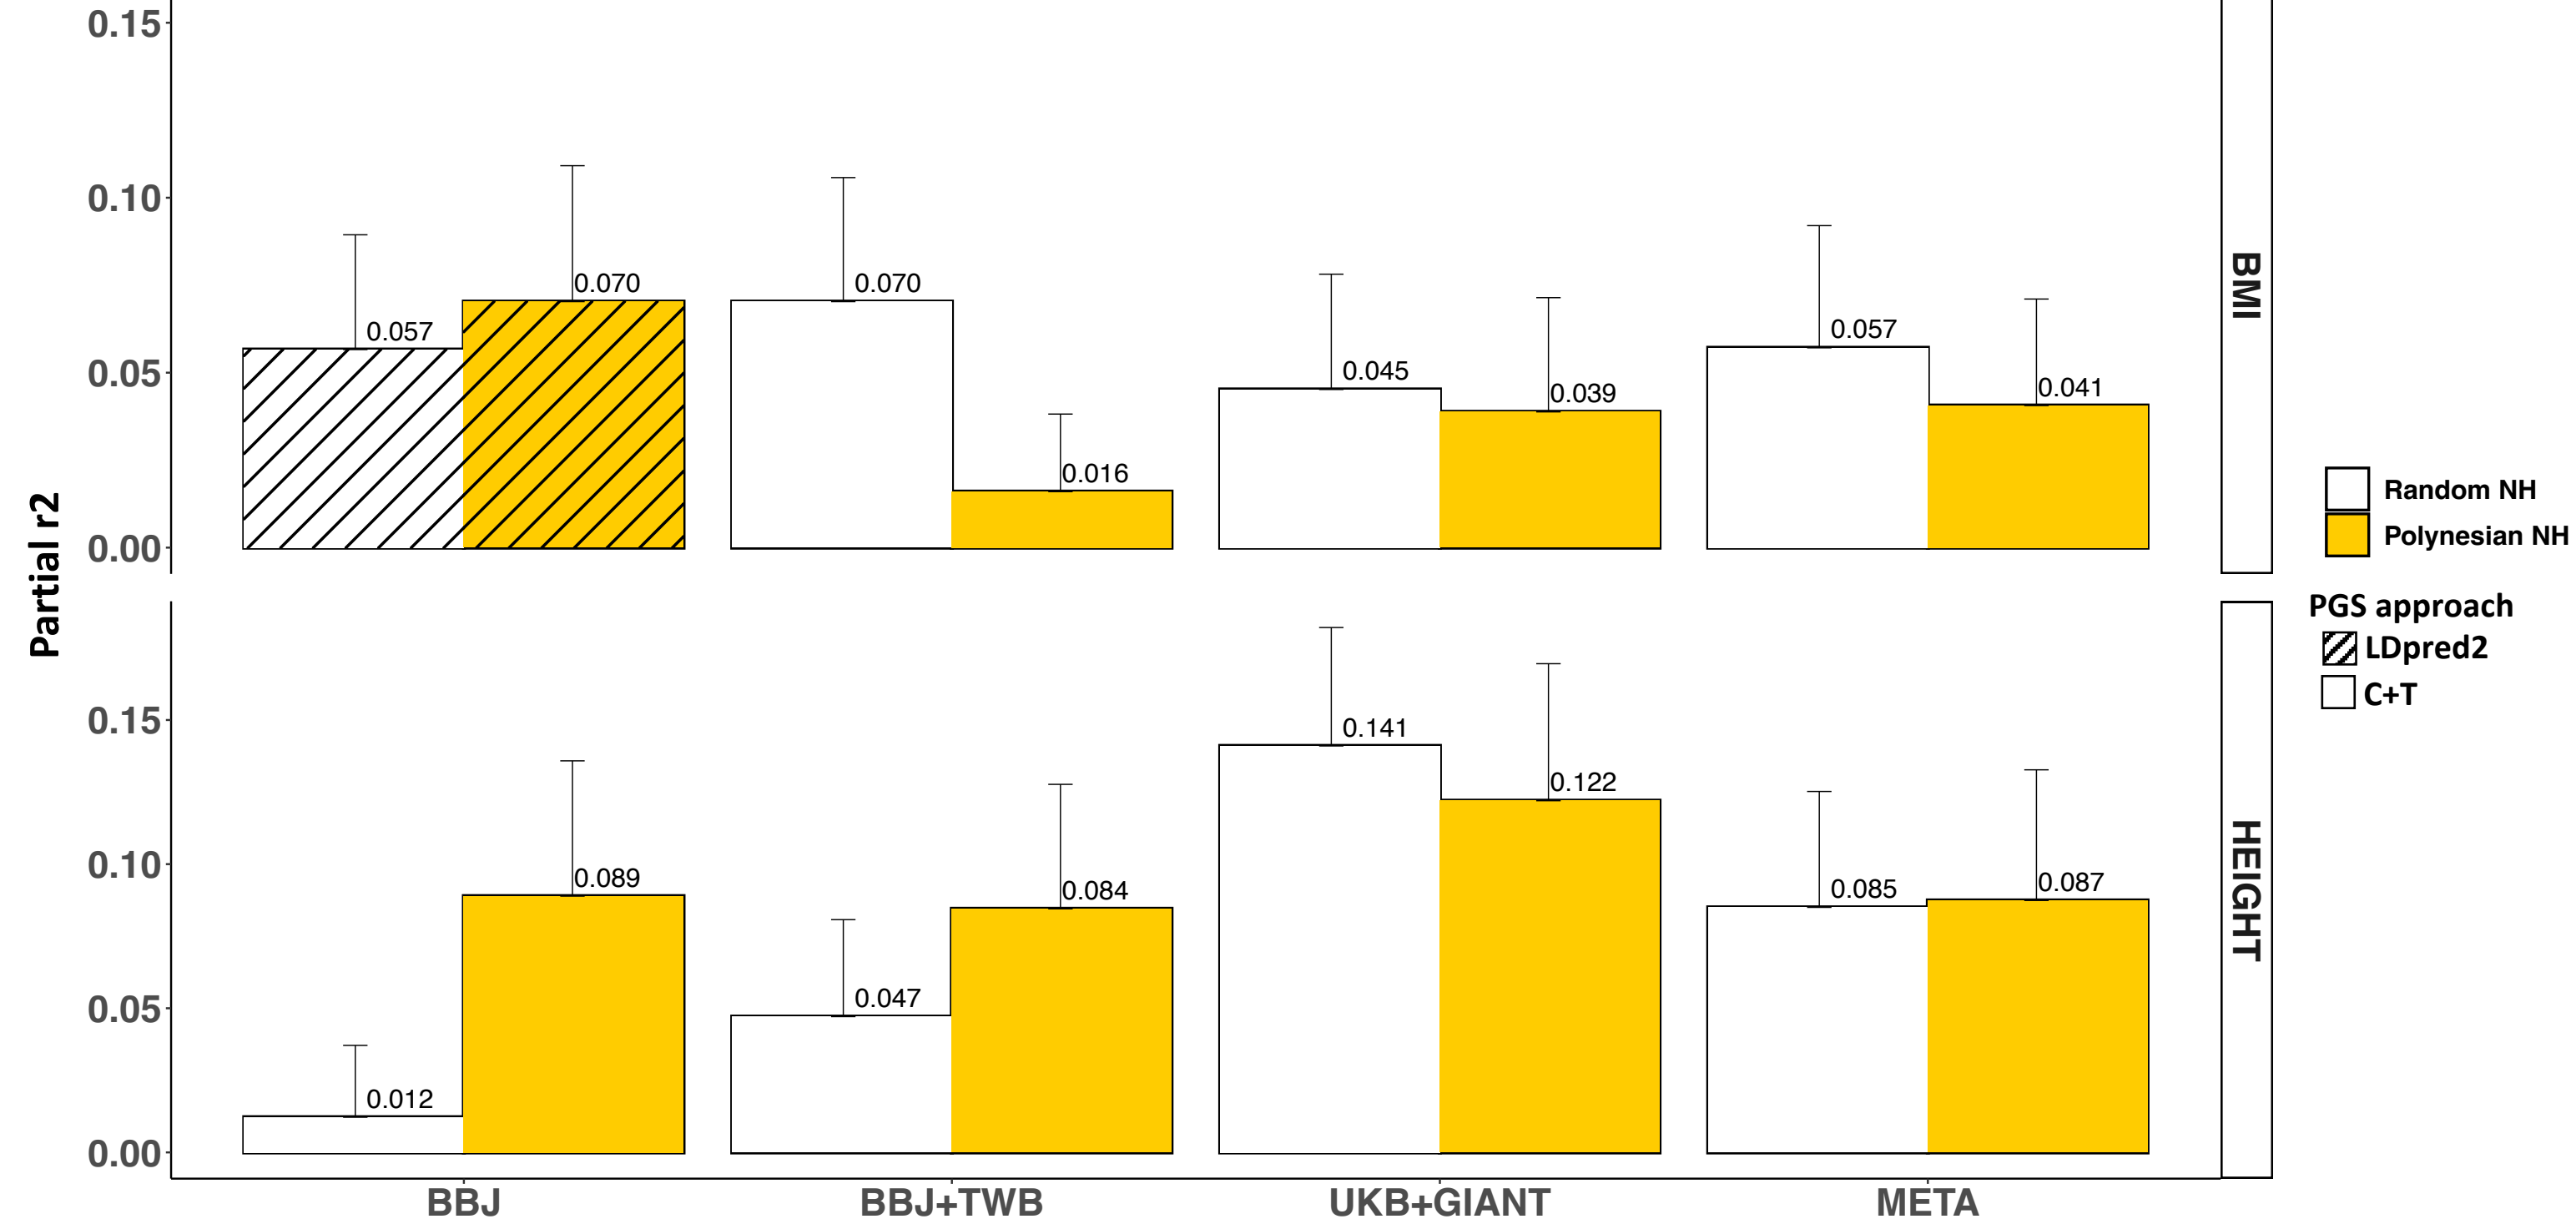

Source: https://medrxiv.org/content/medrxiv/early/2023/12/28/2023.12.25.23300499.full.pdf
